# Supplementary material for: Recapitulating human cardio-pulmonary co-development using simultaneous multilineage differentiation of pluripotent stem cells
Source: eLife. 2022 Jan 12;11:e67872. doi: 10.7554/eLife.67872 (PMC8846595; doi:10.7554/eLife.67872)
Supplement: Figure 1—source data 1. [file elife-67872-fig1-data1.xlsx]

## Sheet: Sheet1
Figure 1-Source Data 1									Statistic
	Fig. 1d								Fig. 1d
									FOXA2					DF=8
	FOXA2	hiPSCs	CHIR (4 mM)	CHIR (7 mM)	CHIR (10 mM)				Tukey's multiple comparisons test	Mean Diff.	95.00% CI of diff.	Significant?	Summary	Adjusted P Value
	Rep 1	1.06674	348.599	683.688	0.581731				hiPSCs vs. CH4	-277.2	-428.3 to -126.1	Yes	***	0.0009
	Rep 2	0.970043	300.929	717.515	0.595755				hiPSCs vs. CH7	-665.3	-816.4 to -514.2	Yes	***	<0.0001
	Rep 3	0.966384	185.077	597.726	0.437838				hiPSCs vs. CH10	0.4626	-150.6 to 151.6	No	ns	>0.9999
	Mean	1	278	666	0.538				CH4 vs. CH7	-388.1	-539.2 to -237.0	Yes	***	<0.0001
	SD	0.0569	884.1	61.8	0.0874				CH4 vs. CH10	277.7	126.6 to 428.8	Yes	***	0.0009
	SEM	0.0329	48.6	35.7	0.0505				CH7 vs. CH10	665.8	514.7 to 816.9	Yes	***	<0.0001
									SOX17					DF=8
	SOX17	hiPSCs	CHIR (4 mM)	CHIR (7 mM)	CHIR (10 mM)				Tukey's multiple comparisons test	Mean Diff.	95.00% CI of diff.	Significant?	Summary	Adjusted P Value
	Rep 1	0.953512	2065.48	69458.1	110.689				hiPSCs vs. 4	-1670	-29772 to 26432	No	ns	0.9974
	Rep 2	1.10773	2091.64	76973.9	157.73				hiPSCs vs. 7	-61003	-89105 to -32900	Yes	***	0.0005
	Rep 3	0.946754	854.83	36578.7	70.5281				hiPSCs vs. 10	-112	-28214 to 27990	No	ns	>0.9999
	Mean	1	1671	61004	113				4 vs. 7	-59333	-87435 to -31231	Yes	***	0.0007
	SD	0.0911	707	21484	43.6				4 vs. 10	1558	-26544 to 29660	No	ns	0.9978
	SEM	0.0526	408	12494	25.2				7 vs. 10	60891	32788 to 88993	Yes	***	0.0005
									NCAM1					DF=8
	NCAM1	hiPSCs	CHIR (4 mM)	CHIR (7 mM)	CHIR (10 mM)				Tukey's multiple comparisons test	Mean Diff.	95.00% CI of diff.	Significant?	Summary	Adjusted P Value
	Rep 1	1.17338	1.08189	8.56526	21.266				hiPSCs vs. CH4	0.03353	-3.083 to 3.150	No	ns	>0.9999
	Rep 2	0.940023	0.965477	8.75306	20.8163				hiPSCs vs. CH7	-6.95	-10.07 to -3.834	Yes	***	0.0002
	Rep 3	0.90662	0.872049	6.55194	23.5567				hiPSCs vs. CH10	-20.87	-23.99 to -17.76	Yes	***	<0.0001
	Mean	1	0.973	7.96	21.9				CH4 vs. CH7	-6.984	-10.10 to -3.867	Yes	***	0.0002
	SD	0.145	0.105	1.22	1.47				CH4 vs. CH10	-20.91	-24.02 to -17.79	Yes	***	<0.0001
	SEM	0.0839	0.0607	0.704	0.848				CH7 vs. CH10	-13.92	-17.04 to -10.81	Yes	***	<0.0001
