# Supplementary material for: Recapitulating human cardio-pulmonary co-development using simultaneous multilineage differentiation of pluripotent stem cells
Source: eLife. 2022 Jan 12;11:e67872. doi: 10.7554/eLife.67872 (PMC8846595; doi:10.7554/eLife.67872)
Supplement: Figure 2—source data 1. [file elife-67872-fig2-data1.xlsx]

## Sheet: Sheet1
Figure 2-Source Data 1									Statistic
	Fig. 2d								Fig. 2d
									NKX2.1					DF=8
	NKX2.1	hiPSCs	CHIR (4 mM)	CHIR (7 mM)	CHIR (10 mM)				Tukey's multiple comparisons test	Mean Diff.	95.00% CI of diff.	Significant?	Summary	Adjusted P Value
	Rep 1	0.790041	0.384987	7192.66	23.517				hiPSCs vs. 4	0.6174	-655.1 to 656.3	No	ns	>0.9999
	Rep 2	0.933033	0.279453	6817.26	29.7257				hiPSCs vs. 7	-7272	-7928 to -6617	Yes	***	<0.0001
	Rep 3	1.3566	0.562966	7810.47	22.5664				hiPSCs vs. 10	-24.24	-679.9 to 631.4	No	ns	0.9994
	Mean	1.03	0.409	7273	25.3				4 vs. 7	-7273	-7929 to -6617	Yes	***	<0.0001
	SD	0.296	0.143	502	3.89				4 vs. 10	-24.86	-680.5 to 630.8	No	ns	0.9993
	SEM	0.17	0.0827	290	2.24				7 vs. 10	7248	6593 to 7904	Yes	***	<0.0001
	Fig. 2e								Fig. 2e
									NKX2.5					DF=8
	NKX2.5	hiPSCs	CHIR (4 mM)	CHIR (7 mM)	CHIR (10 mM)				Tukey's multiple comparisons test	Mean Diff.	95.00% CI of diff.	Significant?	Summary	Adjusted P Value
	Rep 1	1.10703	29.3232	2852.16	6102.21				hiPSCs vs. 4	-25.37	-1390 to 1339	No	ns	>0.9999
	Rep 2	0.957072	24.3145	2838.47	5345.34				hiPSCs vs. 7	-3256	-4620 to -1891	Yes	***	0.0003
	Rep 3	0.943896	25.4841	4079.64	4576.98				hiPSCs vs. 10	-5341	-6705 to -3976	Yes	***	<0.0001
	Mean	1.03	0.409	7273	25.3				4 vs. 7	-3230	-4595 to -1866	Yes	***	0.0003
	SD	0.296	0.143	502	3.89				4 vs. 10	-5315	-6680 to -3951	Yes	***	<0.0001
	SEM	0.17	0.0827	290	2.24				7 vs. 10	-2085	-3449 to -720.1	Yes	**	0.0053
	Fig. 2g								Fig. 2g
									NKX2.1					DF=8
	NKX2.1	hiPSCs	24 hrs	48 hrs	72 hrs				Tukey's multiple comparisons test	Mean Diff.	95.00% CI of diff.	Significant?	Summary	Adjusted P Value
	Rep 1	0.780949	199.522	6951.85	3477.76				hiPSCs vs. 24	-317.3	-1437 to 802.3	No	ns	0.8016
	Rep 2	0.95482	418.485	7730.22	2225.12				hiPSCs vs. 48	-7451	-8570 to -6331	Yes	***	<0.0001
	Rep 3	1.34099	337.084	7672.64	3501.46				hiPSCs vs. 72	-3067	-4187 to -1947	Yes	***	0.0001
	Mean	1.03	318	7452	3068				24 vs. 48	-7133	-8253 to -6014	Yes	***	<0.0001
	SD	0.287	111	434	730				24 vs. 72	-2750	-3869 to -1630	Yes	***	0.0002
	SEM	0.165	63.9	250	422				48 vs. 72	4383	3264 to 5503	Yes	***	<0.0001
	Fig. 2h								Fig. 2h
									NKX2.5					DF=8
	NKX2.1	hiPSCs	24 hrs	48 hrs	72 hrs				Tukey's multiple comparisons test	Mean Diff.	95.00% CI of diff.	Significant?	Summary	Adjusted P Value
	Rep 1	1.03047	218.607	2210.72	3436.73				hiPSCs vs. 24	-230.1	-1093 to 632.5	No	ns	0.8277
	Rep 2	1.15133	247.741	2591.71	2319.61				hiPSCs vs. 48	-2395	-3258 to -1533	Yes	***	<0.0001
	Rep 3	0.842822	226.852	2387.06	3388.22				hiPSCs vs. 72	-3047	-3910 to -2185	Yes	***	<0.0001
	Mean	1.01	231	2396	3048				24 vs. 48	-2165	-3028 to -1303	Yes	***	0.0002
	SD	0.155	15	191	631				24 vs. 72	-2817	-3680 to -1955	Yes	***	<0.0001
	SEM	0.0898	8.67	110	365				48 vs. 72	-651.7	-1514 to 210.9	No	ns	0.1503
