# Supplementary material for: Recapitulating human cardio-pulmonary co-development using simultaneous multilineage differentiation of pluripotent stem cells
Source: eLife. 2022 Jan 12;11:e67872. doi: 10.7554/eLife.67872 (PMC8846595; doi:10.7554/eLife.67872)
Supplement: Figure 3—figure supplement 2—source data 1. [file elife-67872-fig3-figsupp2-data1.xlsx]

## Sheet: Sheet1
Figure 3-Source Data 2										Statistic
	Figure 3-figure supplement 2c
	A8301	-	+	+	-
	IWP4	-	+	-	+					Figure 3-figure supplement 2c
										NKX2.1					DF=8
	NKX2.1	hiPSCs	Plus Both	Plus A8301	Plus IWP4					Tukey's multiple comparisons test	Mean Diff.	95.00% CI of diff.	Significant?	Summary	Adjusted P Value
	Rep 1	0.90125	10155.7	6608.01	2368.9					hiPSCs vs. A8301+IWP4	-9546	-10957 to -8136	Yes	***	<0.0001
	Rep 2	1.43396	8539.88	5595.3	2134.97					hiPSCs vs. A8301	-6209	-7619 to -4799	Yes	***	<0.0001
	Rep 3	0.773782	9946.68	6427.31	2759.13					hiPSCs vs. IWP4	-2420	-3830 to -1010	Yes	**	0.0026
	Mean	1.04	9547	6210	2421					A8301+IWP4 vs. A8301	3337	1927 to 4747	Yes	***	0.0003
	SD	0.35	879	530	315					A8301+IWP4 vs. IWP4	7126	5716 to 8537	Yes	***	<0.0001
	SEM	0.202	507	312	182					A8301 vs. IWP4	3789	2379 to 5199	Yes	***	0.0001
	Figure 3-figure supplement 2d
	A8301	-	+	+	-
	IWP4	-	+	-	+					Figure 3-figure supplement 2d
										NKX2.5					DF=8
	NKX2.5	hiPSCs	Plus Both	Plus A8301	Plus IWP4					Tukey's multiple comparisons test	Mean Diff.	95.00% CI of diff.	Significant?	Summary	Adjusted P Value
	Rep 1	1.03047	2119.02	526.689	420.94					ipsc vs. A8301+IWP4	-2508	-2986 to -2030	Yes	***	<0.0001
	Rep 2	0.948224	2596.42	364.378	463.894					ipsc vs. A8301	-450.6	-928.5 to 27.25	No	ns	0.0647
	Rep 3	1.02335	2812.34	463.749	401.087					ipsc vs. IWP4	-427.6	-905.5 to 50.21	No	ns	0.0804
	Mean	1	2509	452	429					A8301+IWP4 vs. A8301	2058	1580 to 2536	Yes	***	<0.0001
	SD	0.0456	355	81.8	32.1					A8301+IWP4 vs. IWP4	2081	1603 to 2558	Yes	***	<0.0001
	SEM	0.0263	205	47.2	18.5					A8301 vs. IWP4	22.97	-454.9 to 500.8	No	ns	0.9986
