# Supplementary material for: Recapitulating human cardio-pulmonary co-development using simultaneous multilineage differentiation of pluripotent stem cells
Source: eLife. 2022 Jan 12;11:e67872. doi: 10.7554/eLife.67872 (PMC8846595; doi:10.7554/eLife.67872)
Supplement: Figure 3—figure supplement 3—source data 1. [file elife-67872-fig3-figsupp3-data1.xlsx]

## Sheet: Sheet1
Figure 3-Source Data 3										Statistic
	Figure 3-figure supplement 3c
	BMP4	-	-	+	-
	DMH1	-	-	-	+					Figure 3-figure supplement 3c
										NKX2.1					DF=8
	NKX2.1	hiPSCs	vm	vmBMP	vmDMH1					Tukey's multiple comparisons test	Mean Diff.	95.00% CI of diff.	Significant?	Summary	Adjusted P Value
	Rep 1	1.7984	16337.3	11297.9	8218					hiPSCs vs. vm	-13685	-18257 to -9114	Yes	***	<0.0001
	Rep 2	0.8992	11857	12430.6	5563.85					hiPSCs vs. vmBMP	-13088	-17659 to -8516	Yes	***	<0.0001
	Rep 3	0.6184	12865.3	15537.7	7494.97					hiPSCs vs. vmDMH1	-7091	-11662 to -2520	Yes	**	0.0048
	Mean	1.11	13687	13089	7092					vm vs. vmBMP	597.8	-3973 to 5169	No	ns	0.9737
	SD	0.616	2350	2195	1372					vm vs. vmDMH1	6594	2023 to 11165	Yes	**	0.0074
	SEM	0.356	1357	1267	792					vmBMP vs. vmDMH1	5996	1425 to 10568	Yes	*	0.0128
	Figure 3-figure supplement 3d
	BMP4	-	+	+	-
	DMH1	-	+	-	+					Figure 3-figure supplement 3d
										NKX2.5					DF=8
	NKX2.5	hiPSCs	vm	vmBMP	vmDMH1					Tukey's multiple comparisons test	Mean Diff.	95.00% CI of diff.	Significant?	Summary	Adjusted P Value
	Rep 1	0.9054	875.831	532.76	148.441					hiPSCs vs. vm	-828.3	-1134 to -522.9	Yes	***	0.0001
	Rep 2	1.0619	994.215	788.735	177.812					hiPSCs vs. vmbmp	-655.1	-960.5 to -349.8	Yes	***	0.0006
	Rep 3	1.0401	617.901	646.878	214.297					hiPSCs vs. vmDMH1	-179.2	-484.6 to 126.2	No	ns	0.308
	Mean	1	829	656	180					vm vs. vmbmp	173.2	-132.2 to 478.6	No	ns	0.333
	SD	0.0848	192	128	33					vm vs. vmDMH1	649.1	343.8 to 954.5	Yes	***	0.0006
	SEM	0.0489	111	74	19					vmbmp vs. vmDMH1	475.9	170.6 to 781.3	Yes	**	0.0047
