# Supplementary material for: Recapitulating human cardio-pulmonary co-development using simultaneous multilineage differentiation of pluripotent stem cells
Source: eLife. 2022 Jan 12;11:e67872. doi: 10.7554/eLife.67872 (PMC8846595; doi:10.7554/eLife.67872)
Supplement: Figure 3—source data 1. [file elife-67872-fig3-data1.xlsx]

## Sheet: Sheet1
Figure 3-Source Data 1									Statistic
	Fig. 3b
	Activin A	-	-	+	-
	A8301	-	-	-	+				Fig. 3b
									NKX2.1					DF=8
	NKX2.1	hiPSCs	minus Activin	plus activin	plus A8301				Tukey's multiple comparisons test	Mean Diff.	95.00% CI of diff.	Significant?	Summary	Adjusted P Value
	Rep 1	0.930901	15630.8	14393.4	681.675				hiPSCs vs. - Activin	-14510	-16515 to -12505	Yes	***	<0.0001
	Rep 2	1.1303	14047.8	12100.6	345.766				hiPSCs vs. + Activin	-13111	-15117 to -11106	Yes	***	<0.0001
	Rep 3	0.950461	13854	12843.1	382.157				hiPSCs vs. + A8301	-468.9	-2474 to 1536	No	ns	0.8748
	Mean	1	14511	13112	470				- Activin vs. + Activin	1398	-606.8 to 3404	No	ns	0.1939
	SD	0.11	975	1170	184				- Activin vs. + A8301	14041	12036 to 16046	Yes	***	<0.0001
	SEM	0.635	563	675	106				+ Activin vs. + A8301	12642	10637 to 14648	Yes	***	<0.0001
	Fig. 3c
	Activin A	-	-	+	-
	A8301	-	-	-	+				Fig. 3c
									NKX2.5					DF=8
	NKX2.5	hiPSCs	minus Activin	plus activin	plus A8301				Tukey's multiple comparisons test	Mean Diff.	95.00% CI of diff.	Significant?	Summary	Adjusted P Value
	Rep 1	0.986233	1477.15	5.74794	20.515				hiPSCs vs. - Activin	-1442	-1496 to -1388	Yes	***	<0.0001
	Rep 2	1.01396	1453.83	4.58658	22.4823				hiPSCs vs. + Activin	-6.193	-60.24 to 47.86	No	ns	0.9819
	Rep 3	1	1397.2	11.2433	17.6725				hiPSCs vs. + A8301	-19.22	-73.27 to 34.83	No	ns	0.6778
	Mean	1	1443	7.19	10.2				- Activin vs. + Activin	1436	1381 to 1490	Yes	***	<0.0001
	SD	0.0139	41.1	3.56	2.42				- Activin vs. + A8301	1423	1368 to 1477	Yes	***	<0.0001
	SEM	0.008	23.7	2.05	1.4				+ Activin vs. + A8301	-13.03	-67.08 to 41.02	No	ns	0.8649
	Fig. 3e
	BMP4	-	-	+	-
	DMH1	-	-	-	+				Fig. 3e
									NKX2.1
	NKX2.1	hiPSCs	minus BMP4	Plus BMP4	Plus DMH1				Tukey's multiple comparisons test	Mean Diff.	95.00% CI of diff.	Significant?	Summary	Adjusted P Value
	Rep 1	1.33487	11805.2	474.487	9566.43				hiPSCs vs. - BMP4	-11396	-12283 to -10509	Yes	***	<0.0001
	Rep 2	1.0329	11010.4	525.741	8705.37				hiPSCs vs. + BMP4	-493.2	-1380 to 393.5	No	ns	0.3475
	Rep 3	0.725325	11374.9	482.585	8546.99				hiPSCs vs. + DMH1	-8939	-9825 to -8052	Yes	***	<0.0001
	Mean	1.03	11397	494	8940				- BMP4 vs. + BMP4	10903	10016 to 11789	Yes	***	<0.0001
	SD	0.305	398	27.6	549				- BMP4 vs. + DMH1	2457	1571 to 3344	Yes	***	<0.0001
	SEM	0.176	230	15.9	317				+ BMP4 vs. + DMH1	-8445	-9332 to -7559	Yes	***	<0.0001
	Fig. 3f
	BMP4	-	-	+	-
	DMH1	-	-	-	+				Fig. 3f
									NKX2.5
	NKX2.5	hiPSCs	minus BMP4	Plus BMP4	Plus DMH1				Tukey's multiple comparisons test	Mean Diff.	95.00% CI of diff.	Significant?	Summary	Adjusted P Value
	Rep 1	1.2894	1056.67	2494.32	208.81				hiPSCs vs. - BMP4	-1106	-1702 to -510.0	Yes	**	0.0016
	Rep 2	0.777384	1113.08	2780.46	153.48				hiPSCs vs. + BMP4	-2389	-2985 to -1793	Yes	***	<0.0001
	Rep 3	0.997715	1151.47	1894.46	146.379				hiPSCs vs. + DMH1	-168.5	-764.6 to 427.6	No	ns	0.8027
	Mean	1.02	1107	2390	170				- BMP4 vs. + BMP4	-1283	-1879 to -686.6	Yes	***	0.0006
	SD	0.257	47.7	452	34.2				- BMP4 vs. + DMH1	937.5	341.4 to 1534	Yes	**	0.0044
	SEM	0.148	27.5	261	19.7				+ BMP4 vs. + DMH1	2220	1624 to 2816	Yes	***	<0.0001
