# Supplementary material for: Recapitulating human cardio-pulmonary co-development using simultaneous multilineage differentiation of pluripotent stem cells
Source: eLife. 2022 Jan 12;11:e67872. doi: 10.7554/eLife.67872 (PMC8846595; doi:10.7554/eLife.67872)
Supplement: Figure 4—figure supplement 3—source data 1. [file elife-67872-fig4-figsupp3-data1.xlsx]

## Sheet: Sheet1
Figure 4-Source Data 3										Statistic
	Figure 4-figure supplement 3b									Figure 4-figure supplement 3b
										NKX2.1					DF=8
	NKX2.1	hiPSC	Day-15	Day-18 Suspension	Day-18 Matrigel					Tukey's multiple comparisons test	Mean Diff.	95.00% CI of diff.	Significant?	Summary	Adjusted P Value
	Rep 1	1.17555	65403.1	64902	64109.3					hiPSCs vs. Day-15	-73109	-103944 to -42274	Yes	***	0.0003
	Rep 2	0.961481	75702.1	93258	59902.5					hiPSCs vs. Day-18 Suspension	-89136	-119970 to -58301	Yes	***	<0.0001
	Rep 3	0.884743	78224.3	109250	60025.6					hiPSCs vs. Day-18 Matrigel	-61345	-92180 to -30510	Yes	***	0.001
	Mean	1.01	73110	89137	61346					Day-15 vs. Day-18 Suspension	-16027	-46862 to 14808	No	ns	0.3993
	SD	0.151	6791	22459	2394					Day-15 vs. Day-18 Matrigel	11764	-19071 to 42599	No	ns	0.6314
	SEM	0.087	3992	12967	1382					Day-18 Suspension vs. Day-18 Matrigel	27791	-3044 to 58626	No	ns	0.0781
										SFTPC					DF=8
	SFTPC	hiPSC	Day-15	Day-18 Suspension	Day-18 Matrigel					Tukey's multiple comparisons test	Mean Diff.	95.00% CI of diff.	Significant?	Summary	Adjusted P Value
	Rep 1	0.804782	6.62118	925836	6702.82					hiPSCs vs. Day-15	-5.31	-322792 to 322781	No	ns	>0.9999
	Rep 2	0.658233	3.23361	1304670	3313.86					hiPSCs vs. Day-18 Suspension	-1023823	-1346610 to -701037	Yes	***	<0.0001
	Rep 3	1.88775	9.4262	840967	3632.54					hiPSCs vs. Day-18 Matrigel	-4549	-327335 to 318238	No	ns	>0.9999
	Mean	1.12	6.43	1023824	4550					Day-15 vs. Day-18 Suspension	-1023818	-1346604 to -701031	Yes	***	<0.0001
	SD	0.672	3.1	246893	1871					Day-15 vs. Day-18 Matrigel	-4543	-327330 to 318243	No	ns	>0.9999
	SEM	0.388	1.79	142544	1080					Day-18 Suspension vs. Day-18 Matrigel	1019275	696488 to 1342061	Yes	***	<0.0001
										NKX2.5					DF=8
	NKX2.5	hiPSC	Day-15	Day-18 Suspension	Day-18 Matrigel					Tukey's multiple comparisons test	Mean Diff.	95.00% CI of diff.	Significant?	Summary	Adjusted P Value
	Rep 1	1.34723	3167.68	3760.37	549.125					hiPSCs vs. Day-15	-2888	-3723 to -2053	Yes	***	<0.0001
	Rep 2	0.80107	2888.99	2878.48	534.733					hiPSCs vs. Day-18 Suspension	-3106	-3941 to -2271	Yes	***	<0.0001
	Rep 3	0.926588	2610.68	2681.84	505.155					hiPSCs vs. Day-18 Matrigel	-528.6	-1364 to 306.4	No	ns	0.2549
	Mean	1.02	2889	3107	530					Day-15 vs. Day-18 Suspension	-217.8	-1053 to 617.3	No	ns	0.8366
	SD	0.286	279	574	22.4					Day-15 vs. Day-18 Matrigel	2359	1524 to 3195	Yes	***	<0.0001
	SEM	0.165	161	332	12.9					Day-18 Suspension vs. Day-18 Matrigel	2577	1742 to 3412	Yes	***	<0.0001
