# Supplementary material for: Recapitulating human cardio-pulmonary co-development using simultaneous multilineage differentiation of pluripotent stem cells
Source: eLife. 2022 Jan 12;11:e67872. doi: 10.7554/eLife.67872 (PMC8846595; doi:10.7554/eLife.67872)
Supplement: Figure 4—source data 1. [file elife-67872-fig4-data1.xlsx]

## Sheet: Sheet1
Figure 4-Source Data 1										Statistic
	Fig. 4d									Fig. 4d
										NKX2.1					DF=8
	NKX2.1	hiPSCs	Day-15	Day-18 ALI	Day-18 Suspension					Tukey's multiple comparisons test	Mean Diff.	95.00% CI of diff.	Significant?	Summary	Adjusted P Value
	Rep 1	1.11531	16725.7	21539.9	26612.4					hiPSCs vs. Day-15	-19782	-32790 to -6773	Yes	**	0.0054
	Rep 2	1.10617	20930.1	16552	27819.4					hiPSCs vs. Day-18 ALI	-19443	-32452 to -6435	Yes	**	0.006
	Rep 3	1.02165	21692.2	20241.4	43165.1					hiPSCs vs. Day-18 Suspension	-32531	-45540 to -19523	Yes	***	0.0002
	Mean	1.08	19783	19444	32532					Day-15 vs. Day-18 ALI	338.3	-12670 to 13347	No	ns	0.9998
	SD	0.0516	2675	2588	9228					Day-15 vs. Day-18 Suspension	-12750	-25758 to 258.8	No	ns	0.0547
	SEM	0.0298	1544	1494	5328					Day-18 ALI vs. Day-18 Suspension	-13088	-26096 to -79.50	Yes	*	0.0486
	Fig. 4e									Fig. 4e
										SFTPC					DF=8
	SFTPC	hiPSCs	Day-15	Day-18 ALI	Day-18 Suspension					Tukey's multiple comparisons test	Mean Diff.	95.00% CI of diff.	Significant?	Summary	Adjusted P Value
	Rep 1	0.8622	2.2369	136824	583040					hiPSCs vs. Day-15	-0.9724	-196238 to 196236	No	ns	>0.9999
	Rep 2	1.9906	1.3779	71802.7	491344					hiPSCs vs. Day-18 ALI	-137860	-334097 to 58378	No	ns	0.1896
	Rep 3	1.1636	3.3189	204956	318134					hiPSCs vs. Day-18 Suspension	-464172	-660409 to -267934	Yes	***	0.0003
	Mean	1.34	2.31	137861	464173					Day-15 vs. Day-18 ALI	-137859	-334096 to 58379	No	ns	0.1896
	SD	0.584	0.973	66583	134527					Day-15 vs. Day-18 Suspension	-464171	-660408 to -267933	Yes	***	0.0003
	SEM	0.337	0.562	38442	77669					Day-18 ALI vs. Day-18 Suspension	-326312	-522549 to -130075	Yes	**	0.0031
	Fig. 4f									Fig. 4f
										NKX2.5					DF=8
	NKX2.5	hiPSCs	Day-15	Day-18 ALI	Day-18 Suspension					Tukey's multiple comparisons test	Mean Diff.	95.00% CI of diff.	Significant?	Summary	Adjusted P Value
	Rep 1	0.952638	2976.11	864.053	3532.95					hiPSCs vs. Day-15	-2713	-3498 to -1929	Yes	***	<0.0001
	Rep 2	1.30134	2714.28	912.925	2704.4					hiPSCs vs. Day-18 ALI	-888.5	-1673 to -103.8	Yes	*	0.0277
	Rep 3	0.806642	2452.79	891.704	2519.65					hiPSCs vs. Day-18 Suspension	-2918	-3703 to -2133	Yes	***	<0.0001
	Mean	1.02	2714	890	2919					Day-15 vs. Day-18 ALI	1825	1040 to 2610	Yes	***	0.0003
	SD	0.254	262	24.5	540					Day-15 vs. Day-18 Suspension	-204.6	-989.4 to 580.1	No	ns	0.8367
	SEM	0.147	151	14.1	312					Day-18 ALI vs. Day-18 Suspension	-2029	-2814 to -1245	Yes	***	0.0002
	Fig. 4m									Fig. 4m
			No Activin A	No Activin A	Activin A	Activin A				NKX2.1					DF=10
	NKX2.1	hiPSCs	Day-15	Day-18 ALI	Day-15	Day-18				Tukey's multiple comparisons test	Mean Diff.	95.00% CI of diff.	Significant?	Summary	Adjusted P Value
	Rep 1	1.2775	9684.85	36170.8	16097	25514.5				hiPSCs vs. Day-15 no activin	-11199	-18167 to -4231	Yes	**	0.0025
	Rep 2	0.8198	10408.8	29678.8	15458.5	27202.8				hiPSCs vs. Day-18 no activin	-30884	-37852 to -23916	Yes	***	<0.0001
	Rep 3	0.9548	13505.6	26805.7	18931.8	23702.1				hiPSCs vs. Day-15 activin	-16828	-23796 to -9860	Yes	***	<0.0001
	Mean	1.02	11200	30885	16829	25473				hiPSCs vs. Day-18 activin	-25472	-32440 to -18504	Yes	***	<0.0001
	SD	0.235	2029	4798	1849	1751				Day-15 no activin vs. Day-18 no activin	-19685	-26653 to -12717	Yes	***	<0.0001
	SEM	0.136	1172	2770	1067	1011				Day-15 no activin vs. Day-15 activin	-5629	-12597 to 1339	No	ns	0.1316
										Day-15 no activin vs. Day-18 activin	-14273	-21241 to -7306	Yes	***	0.0004
										Day-18 no activin vs. Day-15 activin	14056	7088 to 21024	Yes	***	0.0004
										Day-18 no activin vs. Day-18 activin	5412	-1556 to 12380	No	ns	0.1533
										Day-15 activin vs. Day-18 activin	-8644	-15612 to -1676	Yes	*	0.0147
	Fig. 4n									Fig. 4n
			No Activin A	No Activin A	Activin A	Activin A				SFTPC					DF=10
	SFTPC	hiPSCs	Day-15	Day-18 ALI	Day-15	Day-18				Tukey's multiple comparisons test	Mean Diff.	95.00% CI of diff.	Significant?	Summary	Adjusted P Value
	Rep 1	1.1621	3.13882	2.41072e+06	2.79368	391369				hiPSCs vs. Day-15 no activin	-2.943	-508652 to 508647	No	ns	>0.9999
	Rep 2	0.9571	2.58396	2.0905e+06	13.1085	344927				hiPSCs vs. Day-18 no activin	-2025897	-2534546 to -1517247	Yes	***	<0.0001
	Rep 3	0.8992	6.124	1.57648e+06	3.53983	301171				hiPSCs vs. Day-15 activin	-5.475	-508655 to 508644	No	ns	>0.9999
	Mean	1.01	3.95	2025898	6.48	345822				hiPSCs vs. Day-18 activin	-345821	-854471 to 162828	No	ns	0.2417
	SD	0.138	1.9	420853	5.75	45106				Day-15 no activin vs. Day-18 no activin	-2025894	-2534543 to -1517244	Yes	***	<0.0001
	SEM	0.0798	1.1	242980	3.32	26042				Day-15 no activin vs. Day-15 activin	-2.532	-508652 to 508647	No	ns	>0.9999
										Day-15 no activin vs. Day-18 activin	-345818	-854468 to 162831	No	ns	0.2417
										Day-18 no activin vs. Day-15 activin	2025891	1517242 to 2534541	Yes	***	<0.0001
										Day-18 no activin vs. Day-18 activin	1680076	1171426 to 2188725	Yes	***	<0.0001
										Day-15 activin vs. Day-18 activin	-345816	-854465 to 162834	No	ns	0.2417
