# Supplementary material for: Recapitulating human cardio-pulmonary co-development using simultaneous multilineage differentiation of pluripotent stem cells
Source: eLife. 2022 Jan 12;11:e67872. doi: 10.7554/eLife.67872 (PMC8846595; doi:10.7554/eLife.67872)
Supplement: Figure 4—source data 2. [file elife-67872-fig4-data2.xlsx]

## Sheet: Sheet1
Figure 4-Source Data 2										Statistic
	Figure 4-figure supplement 1c									Figure 4-figure supplement 1c
										SFTPC					DF=8
	SFTPC	hiPSC	Day-15	Day-18	Day-22					Tukey's multiple comparisons test	Mean Diff.	95.00% CI of diff.	Significant?	Summary	Adjusted P Value
	Rep 1	0.769959	3.45767	664139	135891					hiPSCs vs. Day-15	-6.31	-295679 to 295666	No	ns	>0.9999
	Rep 2	1.16105	10.3489	1080189	112894					hiPSCs vs. Day-18	-821368	-1117041 to -525696	Yes	***	<0.0001
	Rep 3	1.11861	8.17378	719781	126780					hiPSCs vs. Day-22	-125187	-420860 to 170485	No	ns	0.5569
	Mean	1.02	7.33	821369	125188					Day-15 vs. Day-18	-821362	-1117035 to -525689	Yes	***	<0.0001
	SD	0.215	3.52	225684	11581					Day-15 vs. Day-22	-125181	-420854 to 170492	No	ns	0.5569
	SEM	0.124	2.03	130403	6686					Day-18 vs. Day-22	696181	400508 to 991854	Yes	***	0.0003
