# Supplementary material for: Recapitulating human cardio-pulmonary co-development using simultaneous multilineage differentiation of pluripotent stem cells
Source: eLife. 2022 Jan 12;11:e67872. doi: 10.7554/eLife.67872 (PMC8846595; doi:10.7554/eLife.67872)
Supplement: Figure 5—figure supplement 1—source data 1. [file elife-67872-fig5-figsupp1-data1.xlsx]

## Sheet: Sheet1
Figure 5-Source Data 2										Statistic
	Figure 5-figure supplement 1c									Figure 5-figure supplement 1c
										NKX2.1					DF=8
	NKX2.1	hiPSC	Day-15	Day-18 CKDCI	Day-18 KDCI					Tukey's multiple comparisons test	Mean Diff.	95.00% CI of diff.	Significant?	Summary	Adjusted P Value
	Rep 1	1.02423	67428.1	56419.9	43672.4					hiPSCs vs. Day-15	-58628	-94862 to -22394	Yes	**	0.0037
	Rep 2	1.02654	53340.6	96126.2	31925.8					hiPSCs vs. Day-18 CKDCI	-85899	-122133 to -49665	Yes	***	0.0003
	Rep 3	0.951098	55117.8	105154	34994.8					hiPSCs vs. Day-18 KDCI	-36863	-73097 to -629.2	Yes	*	0.0462
	Mean	1	58629	85900	36864					Day-15 vs. Day-18 CKDCI	-27271	-63505 to 8963	No	ns	0.1522
	SD	0.0429	7672	25926	6092					Day-15 vs. Day-18 KDCI	21764	-14470 to 57999	No	ns	0.2912
	SEM	0.0248	4429	14969	3517					Day-18 CKDCI vs. Day-18 KDCI	49036	12801 to 85270	Yes	*	0.0107
										SFTPC					DF=8
	SFTPC	hiPSC	Day-15	Day-18 CKDCI	Day-18 KDCI					Tukey's multiple comparisons test	Mean Diff.	95.00% CI of diff.	Significant?	Summary	Adjusted P Value
	Rep 1	0.769959	7.094	1059380	13.5563					hiPSCs vs. Day-15	-4.096	-221092 to 221084	No	ns	>0.9999
	Rep 2	1.16105	3.07389	1396702	22.8853					hiPSCs vs. Day-18 CKDCI	-1220921	-1442009 to -999833	Yes	***	<0.0001
	Rep 3	1.11861	5.17026	1206685	12.1372					hiPSCs vs. Day-18 KDCI	-15.18	-221103 to 221073	No	ns	>0.9999
	Mean	1.02	5.11	1220922	16.2					Day-15 vs. Day-18 CKDCI	-1220917	-1442005 to -999829	Yes	***	<0.0001
	SD	0.215	2.01	169111	5.84					Day-15 vs. Day-18 KDCI	-11.08	-221099 to 221077	No	ns	>0.9999
	SEM	0.124	1.16	97636	3.37					Day-18 CKDCI vs. Day-18 KDCI	1220906	999818 to 1441994	Yes	***	<0.0001
	Figure 5-figure supplement 1e
	% Overlapping									Figure 5-figure supplement 1e
	Day-16	Day-20	Day-23												DF=87
	100	46.2327	47.0383							Tukey's multiple comparisons test	Mean Diff.	95.00% CI of diff.	Significant?	Summary	Adjusted P Value
	100	83.0588	48.2043							Day-16 vs. Day-20	43.74	34.16 to 53.32	Yes	***	<0.0001
	100	58.2842	22.1593							Day-16 vs. Day- 23	67.96	58.38 to 77.53	Yes	***	<0.0001
	100	36.8892	42.369							Day-20 vs. Day- 23	24.22	14.64 to 33.79	Yes	***	<0.0001
	100	35.1151	19.9441
	100	46.0095	26.6978
	100	62.8593	49.5037
	100	70.8508	58.2547
	100	84.5191	53.0376
	100	68.6775	22.0887
	100	96.7828	39.9771
	100	55.6442	16.8087
	100	87.8239	53.5975
	100	41.9502	15.491
	100	61.5131	36.5523
	100	44.442	0
	100	34.609	26.1485
	100	35.4261	42.0416
	100	69.2718	46.9984
	100	57.8557	59.1647
	100	64.8821	13.0615
	100	8.58602	51.3889
	100	46.3096	23.5125
	100	27.4924	33.9464
	100	32.5052	17.8144
	100	67.6916	0
	100	64.6016	27.2144
	100	51.5686	26.0269
	100	100	18.088
	100	46.3314	24.1003
