# Supplementary material for: Recapitulating human cardio-pulmonary co-development using simultaneous multilineage differentiation of pluripotent stem cells
Source: eLife. 2022 Jan 12;11:e67872. doi: 10.7554/eLife.67872 (PMC8846595; doi:10.7554/eLife.67872)
Supplement: Figure 5—source data 1. [file elife-67872-fig5-data1.xlsx]

## Sheet: Sheet1
Figure 5-Source Data 1																		Statistic
																		Fig. 5d
	Fig. 5d	% overlapping																Day-18					DF=116
	Day-18					Day-22					Day-25							Tukey's multiple comparisons test	Mean Diff.	95.00% CI of diff.	Significant?	Summary	Adjusted P Value
	CKDCI	KDCI	KDCI+IWP4	KDCI+NSC		CKDCI	KDCI	KDCI+IWP4	KDCI+NSC		CKDCI	KDCI	KDCI+IWP4	KDCI+NSC				CKDCI vs. KDCI	1.329	-0.8731 to 3.531	No	ns	0.3979
	100	81.9613	100	100		61.104	29.9552	16.1524	30.3515		65.0883	18.8438	0	11.8408				CKDCI vs. KDCI+IWP4	0	-2.202 to 2.202	No	ns	>0.9999
	100	100	100	100		62.068	29.0907	28.1973	20.2385		62.0832	26.5089	18.2423	9.37714				CKDCI vs. KDCI+NSC	1.284	-0.9185 to 3.486	No	ns	0.4293
	100	100	100	100		29.6675	23.7682	62.645	15.0081		48.8323	0	30.0333	7.85694				KDCI vs. KDCI+IWP4	-1.329	-3.531 to 0.8731	No	ns	0.3979
	100	100	100	100		42.6708	57.5864	52.6071	18.1767		67.4019	28.4201	32.244	12.7553				KDCI vs. KDCI+NSC	-0.04541	-2.247 to 2.157	No	ns	>0.9999
	100	100	100	100		62.7339	75.7212	20.911	24.7436		56.7794	25.6237	7.80988	0				KDCI+IWP4 vs. KDCI+NSC	1.284	-0.9185 to 3.486	No	ns	0.4293
	100	85.4261	100	100		59.1627	32.9264	15.8754	25.3146		69.7219	18.8776	23.2662	14.7249
	100	100	100	100		50.9318	21.1763	22.5187	14.7622		59.1744	9.72302	21.4572	11.7008				Day-22					DF=116
	100	92.7423	100	100		41.4632	15.2537	19.559	25.9692		20.6753	19.021	8.7955	26.1232				Tukey's multiple comparisons test	Mean Diff.	95.00% CI of diff.	Significant?	Summary	Adjusted P Value
	100	100	100	100		64.0983	12.7419	23.0677	46.3579		40.7197	14.4919	10.1207	25.8402				CKDCI vs. KDCI	23.69	4.788 to 42.58	Yes	**	0.0077
	100	100	100	100		33.4103	20.481	10.7041	29.8074		14.8058	4.9132	10.7669	13.2668				CKDCI vs. KDCI+IWP4	22.8	3.906 to 41.70	Yes	*	0.0112
	100	100	100	100		28.4747	19.4997	14.7755	35.542		32.4746	0	0	13.7388				CKDCI vs. KDCI+NSC	29.83	10.93 to 48.72	Yes	***	0.0004
	100	100	100	100		100	11.7882	15.5898	37.1401		63.6354	14.9645	9.78691	22.4663				KDCI vs. KDCI+IWP4	-0.8827	-19.78 to 18.01	No	ns	0.9994
	100	100	100	100		37.531	31.1199	11.5598	14.3886		49.2362	21.218	0	0				KDCI vs. KDCI+NSC	6.141	-12.76 to 25.04	No	ns	0.8318
	100	100	100	100		10.5511	17.6543	36.5142	8.81815		40.8203	23.3514	28.9858	0				KDCI+IWP4 vs. KDCI+NSC	7.024	-11.87 to 25.92	No	ns	0.7674
	100	100	100	100		20.6638	21.7077	100	17.3768		17.913	13.5017	26.8315	17.0778
	100	100	100	100		52.6207	30.5254	100	15.3351		14.086	0	17.5775	18.0094				Day-25					DF=116
	100	100	100	100		56.8908	16.4741	14.8513	18.9379		43.6079	15.6266	0	0				Tukey's multiple comparisons test	Mean Diff.	95.00% CI of diff.	Significant?	Summary	Adjusted P Value
	100	100	100	78.3041		46.713	100	27.3406	20.1631		47.3474	17.0182	0	5.14347				CKDCI vs. KDCI	37.66	23.25 to 52.06	Yes	***	<0.0001
	100	100	100	100		34.6729	26.2333	13.5884	23.9406		65.5166	12.8261	0	13.9959				CKDCI vs. KDCI+IWP4	46.07	31.67 to 60.47	Yes	***	<0.0001
	100	100	100	100		100	21.8746	43.6213	25.427		100	8.59682	17.5669	0				CKDCI vs. KDCI+NSC	43.39	28.99 to 57.79	Yes	***	<0.0001
	100	100	100	100		100	7.74594	75.6036	20.8039		100	0	32.8883	15.12				KDCI vs. KDCI+IWP4	8.416	-5.987 to 22.82	No	ns	0.4271
	100	100	100	83.1767		100	28.5495	21.5747	13.3479		100	31.0756	8.71417	19.2725				KDCI vs. KDCI+NSC	5.736	-8.667 to 20.14	No	ns	0.7275
	100	100	100	100		100	100	65.2099	62.4898		100	100	51.5038	38.4048				KDCI+IWP4 vs. KDCI+NSC	-2.68	-17.08 to 11.72	No	ns	0.9623
	100	100	100	100		66.4639	100	72.5149	39.5929		75.4424	100	16.8693	13.568
	100	100	100	100.011		100	100	100	74.4128		100	25.6117	23.6825	51.61
	100	100	100	100		100	30.6994	63.6361	100		57.267	23.7485	34.5134	83.2147
	100	100	100	100		100	54.4938	60.0514	100		100	73.2964	0	26.1161
	100	100	100	100		72.3772	17.1478	37.8116	78.018		68.2185	21.452	24.6185	30.3052
	100	100	100	100		100	31.7479	39.6245	27.6158		100	11.4878	0	23.4347
	100	100	100	100		62.2617	100	26.3371	17.6411		57.5976	28.5513	0	11.7207
