# Supplementary material for: Recapitulating human cardio-pulmonary co-development using simultaneous multilineage differentiation of pluripotent stem cells
Source: eLife. 2022 Jan 12;11:e67872. doi: 10.7554/eLife.67872 (PMC8846595; doi:10.7554/eLife.67872)
Supplement: Figure 6—figure supplement 1—source data 1. [file elife-67872-fig6-figsupp1-data1.xlsx]

## Sheet: Sheet1
Figure 6-Source Data 2
	Figure 6-figure supplement 1b
	HOPX	hiPSC	Day-15	Day-18 Suspension						Fig. 6-figure supplement 1
	Rep 1	1.1356	822.858	33275.9						HOPX					DF=6
	Rep 2	1.0033	1383.42	42786.7						Tukey's multiple comparisons test	Mean Diff.	95.00% CI of diff.	Significant?	Summary	Adjusted P Value
	Rep 3	1.3825	1904.12	77088.8						hiPSC vs. Day-15	-1369	-34712 to 31974	No	ns	0.9913
	Mean	1	58629	85900						hiPSC vs. Day-18 Suspension	-51049	-84392 to -17707	Yes	**	0.008
	SD	0.0429	7672	25926						Day-15 vs. Day-18 Suspension	-49680	-83023 to -16338	Yes	**	0.0091
	SEM	0.0248	4429	14969
