# Supplementary material for: Recapitulating human cardio-pulmonary co-development using simultaneous multilineage differentiation of pluripotent stem cells
Source: eLife. 2022 Jan 12;11:e67872. doi: 10.7554/eLife.67872 (PMC8846595; doi:10.7554/eLife.67872)
Supplement: Figure 6—source data 1. [file elife-67872-fig6-data1.xlsx]

## Sheet: Sheet1
Figure 6-Source Data 1
	Figure 6e		Calcium imaging
	0.1 mM Verapamil				1 mM Verapamil				10 mM Verapamil
	Time (ms)	Pre	Post		Time (ms)	Pre	Post		Time (ms)	Pre	Post
	1	406.886	453.739		1	1563.16	362.856		1	1017.26	179.438
	2	403.551	448.367		2	1578.22	361.459		2	991.906	178.772
	3	402.174	446.371		3	1605.66	361.785		3	976.844	178.767
	4	400.133	442.573		4	1626.71	361.167		4	957.855	178.71
	5	399.683	439.871		5	1622.56	358.278		5	935.089	178.944
	6	398.964	436.055		6	1611.34	357.552		6	914.124	179.039
	7	399.811	433.44		7	1593.37	358.257		7	898.299	180.021
	8	400.627	431.483		8	1582.47	359.84		8	885.78	178.955
	9	400.775	431.511		9	1584.1	359.921		9	871.159	178.636
	10	398.104	427.764		10	1578.62	361.599		10	860.104	179.84
	11	396.772	423.91		11	1568.45	359.065		11	844.489	179.827
	12	397.248	421.964		12	1541.51	358.875		12	827.7	178.932
	13	397.531	418.735		13	1506.83	357.452		13	811.689	177.872
	14	398.543	417.029		14	1477.1	357.73		14	796.457	177.887
	15	398.812	415.506		15	1456.42	359.742		15	787.267	180.77
	16	398.596	415.658		16	1441.35	361.583		16	778.103	179.307
	17	396.696	413.242		17	1433.1	361.097		17	769.743	179.352
	18	395.572	410.407		18	1409.89	360.565		18	755.868	180.393
	19	395.296	407.555		19	1372.91	357.376		19	742.622	179.529
	20	396.366	405.009		20	1337.26	356.456		20	731.599	179.366
	21	396.474	404.733		21	1302.83	357.798		21	720.715	177.848
	22	396.354	402.259		22	1288.05	359.596		22	714.469	178.802
	23	395.705	402.45		23	1273.33	360.925		23	709.412	179.111
	24	394.588	400.523		24	1258.27	360.691		24	698.104	179.175
	25	393.612	397.801		25	1230.74	357.494		25	688.263	178.29
	26	393.399	395.416		26	1196.42	356.116		26	676.55	178.058
	27	395.25	393.402		27	1163.55	357.145		27	667.253	178.693
	28	395.666	392.172		28	1138.7	357.258		28	662.901	177.397
	29	395.244	391.816		29	1125.72	359.544		29	655.979	178.086
	30	393.968	391.28		30	1114.09	361.047		30	651.287	179.16
	31	393.081	388.98		31	1097.09	359.001		31	644.657	178.576
	32	392.001	386.948		32	1071.6	357.259		32	635.419	178.975
	33	392.404	385.032		33	1043.46	354.65		33	626.842	178.628
	34	393.333	383.452		34	1017.81	355.983		34	619.346	178.459
	35	395.175	382.782		35	997.908	358.109		35	616.537	178.484
	36	394.635	382.701		36	989.462	359.323		36	612.55	178.685
	37	392.779	381.47		37	977.807	359.839		37	607.737	178.615
	38	392.533	379.623		38	964.473	358.439		38	600.583	179.125
	39	390.601	377.738		39	942.762	356.063		39	594.867	178.831
	40	391.866	375.524		40	919.513	355.207		40	587.15	178.461
	41	392.982	375.265		41	899.176	356.413		41	581.833	178.428
	42	393.612	374.995		42	886.978	357.419		42	579.678	177.803
	43	392.862	374.197		43	880.856	359.735		43	578.176	179.393
	44	390.964	373.001		44	873.962	358.66		44	574.626	179.743
	45	389.084	371.939		45	859.287	357.268		45	569.133	178.535
	46	388.977	370.041		46	840.154	355.878		46	560.85	178.181
	47	390.444	368.599		47	822.311	355.467		47	556.828	177.352
	48	391.533	368.431		48	808.442	356.808		48	552.965	179.105
	49	392.523	368.494		49	801.75	358.281		49	552.932	179.019
	50	390.877	368.395		50	797.379	359.615		50	552.036	178.702
	51	388.562	367.31		51	790.222	359.414		51	546.588	178.667
	52	389.157	365.115		52	776.604	356.057		52	543.019	177.788
	53	389.014	363.72		53	762.173	354.775		53	536.797	177.907
	54	390.672	362.575		54	746.895	354.764		54	533.495	177.661
	55	391.31	362.084		55	737.137	356.458		55	531.213	177.16
	56	391.901	362.288		56	733.186	358.38		56	531.113	177.368
	57	390.135	361.499		57	729.088	359.35		57	529.595	178.86
	58	390.143	360.41		58	725.762	357.132		58	526.664	178.735
	59	389.179	359.18		59	713.424	355.154		59	522.193	177.66
	60	389.996	357.868		60	701.622	354.614		60	517.458	177.903
	61	391.524	357.674		61	689.677	354.174		61	515.546	177.364
	62	392.611	357.397		62	682.331	356.746		62	515.08	178.189
	63	392.187	357.232		63	682.003	359.692		63	514.06	178.138
	64	390.442	357.066		64	680.38	358.175		64	513.339	179.35
	65	389.431	356.521		65	674.408	357.299		65	508.934	178.879
	66	389.099	354.888		66	664.038	354.892		66	505.552	179.152
	67	390.225	353.047		67	653.908	353.45		67	502.278	178.177
	68	391.488	353.295		68	642.879	354.769		68	500.742	178.138
	69	392.262	353.827		69	642.452	356.784		69	500.121	178.71
	70	390.857	354.356		70	640.811	358.19		70	499.865	178.949
	71	389.942	352.761		71	638.542	357.378		71	499.826	179.447
	72	424.218	351.466		72	634.488	355.715		72	496.535	178.375
	73	520.15	350.677		73	625.49	353.784		73	492.64	178.971
	74	597.53	349.542		74	616.158	353.064		74	489.725	178.407
	75	667.425	349.653		75	609.321	354.434		75	489.495	177.681
	76	732.896	350.225		76	607.516	357.2		76	489.039	178.718
	77	785.011	350.547		77	608.929	356.91		77	488.986	178.27
	78	831.527	348.652		78	606.98	356.674		78	487.978	177.792
	79	875.688	348.533		79	601.939	354.34		79	484.307	178.772
	80	917.832	347.083		80	593.765	353.182		80	482.452	178.401
	81	958.296	345.953		81	585.607	352.631		81	478.574	178.2
	82	998.562	345.981		82	582.834	354.432		82	479.838	177.294
	83	1029.02	347.361		83	582.705	357.125		83	479.976	177.959
	84	1058.02	346.623		84	582.682	357.248		84	481.391	177.21
	85	1084.38	345.854		85	581.532	355.573		85	478.048	178.261
	86	1109.96	344.577		86	574.83	353.542		86	475.852	178.722
	87	1140.51	343.893		87	567.709	353.056		87	473.55	177.938
	88	1171	343.976		88	562.179	352.674		88	471.656	178.654
	89	1196.78	344.312		89	560.597	355.604		89	471.32	177.951
	90	1216.85	344.42		90	560.869	357.545		90	471.951	178.669
	91	1235.09	343.925		91	562.599	358.146		91	472.385	179.339
	92	1249.79	342.924		92	560.208	355.057		92	469.777	178.516
	93	1271.23	341.608		93	553.422	352.565		93	467.215	179.259
	94	1290.76	340.725		94	547.995	352.942		94	465.289	178.311
	95	1311.27	341.506		95	543.128	354.675		95	465.627	178.963
	96	1324.74	341.907		96	542.734	355.468		96	465.282	178.045
	97	1327.32	341.871		97	544.159	357.549		97	465.402	178.772
	98	1322.93	341.338		98	544.679	357.394		98	465.366	179.558
	99	1315.31	340.798		99	542.862	355.234		99	463.495	179.29
	100	1308.29	340.126		100	536.407	353.115		100	461.703	179.025
	101	1301.6	338.363		101	530.73	353.609		101	459.803	177.749
	102	1293.67	339.306		102	527.839	354.482		102	459.785	177.426
	103	1279.01	340.393		103	527.463	357.185		103	460.269	178.294
	104	1258.75	340.433		104	531.644	356.561		104	461.178	178.854
	105	1231.28	339.13		105	531.646	356.326		105	460.038	178.257
	106	1209.27	338.249		106	527.185	354.174		106	457.667	178.903
	107	1190.64	337.254		107	522.362	352.817		107	455.353	178.097
	108	1173.55	337.224		108	516.315	353.801		108	454.808	178.28
	109	1154.12	337.727		109	515.516	356.345		109	454.407	178.43
	110	1131.12	338.566		110	517.646	357.392		110	455.814	178.825
	111	1102.35	338.338		111	519.116	357.511		111	456.636	179.206
	112	1073.3	337.5		112	519.291	355.377		112	453.762	179.097
	113	1049.56	336.885		113	515.444	354.374		113	453.129	179.191
	114	1028.54	335.442		114	509.859	353.077		114	451.268	177.784
	115	1010.14	335.194		115	505.504	353.578		115	450.394	177.84
	116	989.366	335.897		116	506.254	355.799		116	450.49	177.842
	117	964.208	335.874		117	509.04	358.752		117	452.522	179.8
	118	939.066	335.75		118	510.367	357.725		118	453.489	177.926
	119	915.314	335.809		119	508.784	355.929		119	450.14	178.158
	120	895.748	334.962		120	503.611	354.563		120	449.095	178.142
	121	879.441	334.587		121	499.952	353.101		121	447.93	179.411
	122	865.383	335.167		122	498.345	354.857		122	447.209	177.099
	123	849.189	336.324		123	498.715	356.711		123	449.079	178.502
	124	827.129	336.535		124	501.559	357.875		124	448.583	178.566
	125	807.185	336.458		125	502.694	358.017		125	448.755	177.959
	126	789.431	335.507		126	499.312	354.929		126	445.75	178.305
	127	775.629	334.35		127	496.68	353.242		127	445.594	178.002
	128	765.294	333.982		128	490.928	354.47		128	443.192	178.708
	129	755.457	334.989		129	490.286	355.384		129	443.653	177.181
	130	740.556	336.286		130	492.926	358.268		130	445.462	178.786
	131	724.58	336.151		131	494.706	358.436		131	445.698	178.866
	132	711.411	335.791		132	495.585	357.228		132	444.367	177.903
	133	696.803	334.614		133	491.923	355.965		133	442.218	177.632
	134	688.873	334.302		134	487.263	353.528		134	441.539	178.961
	135	681.108	333.565		135	483.96	359.312		135	442.005	177.796
	136	673.047	334.973		136	483.727	422.548		136	441.542	177.856
	137	663.058	335.263		137	485.432	487.712		137	442.172	177.984
	138	650.032	335.838		138	488.059	541.805		138	443.692	178.453
	139	639.089	335.757		139	487.341	591.089		139	442.061	178.625
	140	631.372	335.59		140	485.072	638.092		140	439.46	177.465
	141	624.233	334.948		141	480.338	685.153		141	438.41	178.759
	142	618.908	335.487		142	477.228	731.287		142	438.667	178.187
	143	612.025	335.821		143	478.644	780.787		143	439.464	178.342
	144	603.559	336.95		144	481.076	825.965		144	440.694	179.708
	145	593.196	336.178		145	482.124	859.449		145	441.011	179.027
	146	586.058	336.472		146	482.896	890.559		146	439.155	177.946
	147	580.06	335.129		147	477.587	919.498		147	438.071	178.529
	148	575.278	336.222		148	473.867	945.946		148	437.28	177.599
	149	571.104	336.534		149	472.829	982.466		149	437.962	176.761
	150	565.596	367.492		150	473.11	1017.35		150	439.352	178.671
	151	558.774	459.803		151	476.862	1046.69		151	440.122	178.053
	152	551.433	537.213		152	478.487	1068.75		152	440.606	178.566
	153	545.095	608.645		153	475.746	1082.39		153	437.884	177.599
	154	540.519	675.299		154	472.278	1099.28		154	436.456	179.611
	155	537.551	737.782		155	468.802	1122.51		155	435.489	178.245
	156	534.754	799.046		156	469.12	1148.93		156	436.924	179.062
	157	528.681	853.855		157	470.482	1174.29		157	439.212	178.697
	158	521.811	905.06		158	473.188	1191.5		158	439.385	178.358
	159	516.076	948.529		159	473.841	1194.1		159	440.816	180.366
	160	511.474	989.146		160	471.679	1192.09		160	440.301	179.23
	161	508.349	1027.38		161	466.84	1192.78		161	479.347	179.317
	162	506.782	1067.27		162	464.852	1193.6		162	601.63	178.14
	163	504.144	1105.43		163	466.199	1202.14		163	715.674	177.825
	164	499.725	1146.21		164	468.452	1195.49		164	827.895	178.885
	165	494.566	1180.43		165	471.686	1186.01		165	934.69	178.823
	166	489.308	1208.85		166	470.717	1163.13		166	1028.97	177.982
	167	486.715	1236.44		167	467.084	1134.1		167	1114.56	177.909
	168	484.749	1264.82		168	463.848	1115.25		168	1191.74	178.021
	169	482.97	1298.35		169	462.082	1102.29		169	1265.18	178.212
	170	480.48	1332.22		170	463.831	1090.66		170	1340.46	177.809
	171	477.014	1363.09		171	467.069	1075.32		171	1408.26	178.953
	172	472.523	1386.7		172	468.819	1048.29		172	1468.7	179.409
	173	468.538	1409.37		173	467.125	1016.8		173	1515.37	178.037
	174	467.068	1429.02		174	464.114	992.659		174	1559.72	179.15
	175	465.009	1446.47		175	460.716	968.925		175	1603.65	177.749
	176	464.242	1472.84		176	459.295	952.837		176	1651.95	178.101
	177	461.223	1497.14		177	460.729	939.035		177	1698.7	178.984
	178	458.751	1513.44		178	464.385	921.276		178	1745.63	179.733
	179	455.168	1527.38		179	465.055	893.941		179	1779.53	178.066
	180	452.621	1537.16		180	463.685	868.806		180	1808.08	177.992
	181	450.894	1536.08		181	460.873	845.923		181	1834.35	177.753
	182	450.265	1537.86		182	457.15	829.491		182	1862.01	178.831
	183	448.997	1547.5		183	456.902	817.905		183	1897.49	177.459
	184	447.205	1544.82		184	460.439	804.399		184	1935.31	177.704
	185	443.069	1537.48		185	462.108	789.771		185	1964.54	177.846
	186	441.185	1517.59		186	463.362	767.142		186	1984.36	178.257
	187	438.402	1495.49		187	461.066	746.531		187	1997.04	178.471
	188	439.501	1473.69		188	456.898	730.248		188	2011.49	178.08
	189	438.275	1455.53		189	454.401	718.246		189	2025.27	178.305
	190	437.132	1436.34		190	455.045	712.565		190	2049.48	178.372
	191	434.704	1418.5		191	457.911	701.792		191	2058.09	179.181
	192	432.183	1392.51		192	461.113	689.197		192	2059	178.253
	193	429.091	1365.11		193	460.215	670.867		193	2042.8	178.718
	194	428.523	1337.34		194	457.877	657.944		194	2014.29	177.899
	195	428.663	1310.45		195	454.921	645.533		195	1989.17	178.697
	196	427.898	1287.71		196	452.923	639.423		196	1973.58	178.161
	197	427.161	1265.61		197	455.216	632.552		197	1952.76	178.228
	198	425.439	1241.62		198	456.951	624.66		198	1929.39	178.012
	199	422.978	1214.83		199	459.407	614.571		199	1896.22	178.891
	200	420.896	1183.47		200	457.839	601.855		200	1855.6	177.946
	201	420.364	1155.41		201	454.646	591.088		201	1812.36	179.835
	202	420.703	1131.37		202	450.838	582.795		202	1771.75	178.558
	203	421.142	1112.46		203	450.531	579.12		203	1740	178.463
	204	419.352	1089.38		204	452.913	576.223		204	1714.35	178.311
	205	417.572	1068.71		205	456.133	569.21		205	1681.96	177.496
	206	414.704	1040.17		206	457.477	560.275		206	1641.57	178.891
	207	413.984	1016.24		207	454.914	551.193		207	1595.02	178.054
	208	413.469	992.284		208	452.633	541.952		208	1550.54	178.319
	209	413.88	972.082		209	449.738	536.331		209	1513.63	178.638
	210	413.301	952.096		210	450.739	535.213		210	1483.77	178.142
	211	411.714	935.889		211	453.621	532.118		211	1450.62	179.471
	212	410.356	915.622		212	456.806	526.678		212	1418.66	178.352
	213	408.727	894.016		213	457.146	519.152		213	1379.22	178.885
	214	407.385	871.275		214	467.153	510.749		214	1340.96	176.936
	215	407.893	851.767		215	559.207	505.874		215	1303.33	177.253
	216	409.1	836.454		216	643.714	503.948		216	1273.1	177.942
	217	408.301	823.698		217	724.062	502.297		217	1249.56	178.333
	218	406.079	808.264		218	803.779	500.172		218	1224.77	177.998
	219	404.736	791.257		219	877.507	493.884		219	1197.85	178.562
	220	403.396	775.001		220	941.026	486.304		220	1165.46	178.57
	221	404.124	758.419		221	988.484	481.146		221	1135.25	178.232
	222	404.261	743.691		222	1029.15	477.202		222	1106.17	179.072
	223	404.455	731.329		223	1070.91	475.711		223	1083.18	178.794
	224	403.979	719.851		224	1116.54	475.125		224	1065.29	178.99
	225	402.216	709.166		225	1166.89	472.772		225	1044.13	179.422
	226	400.415	695.83		226	1209.08	468.729		226	1023.32	178.529
	227	400.431	681.316		227	1237.9	461.389		227	998.265	178.276
	228	399.833	669.404		228	1259.86	456.86		228	974.72	178.768
	229	400.475	658.277		229	1277.41	453.827		229	953.218	177.088
	230	400.904	650.659		230	1305.04	454.951		230	936.212	177.337
	231	400.573	641.588		231	1343.48	453.909		231	923.436	178.438
	232	398.043	632.714		232	1379.47	452.719		232	909.766	178.342
	233	396.744	622.577		233	1412.05	447.643		233	890.905	178.718
	234	396.175	609.984		234	1421.99	442.351		234	871.54	178.504
	235	397.127	601.802		235	1434.98	438.012		235	854.267	177.329
	236	398.428	593.611		236	1447.36	435.404		236	839.128	177.634
	237	398.191	587.247		237	1469.01	437.175		237	830.723	178.747
	238	397.436	581.475		238	1500.77	436.388		238	818.321	177.381
	239	396.268	573.371		239	1533.27	434.51		239	806.332	178.012
	240	395.666	564.963		240	1548.29	429.067		240	792.765	178.973
	241	395.203	556.804		241	1552.37	425.186		241	778.799	178.846
	242	395.572	549.351		242	1556.69	422.413		242	764.243	177.996
	243	396.49	543.261		243	1557.05	422.336		243	753.996	177.551
	244	396.746	538.787		244	1575.9	423.962		244	746.222	177.644
	245	395.523	533.207		245	1594.14	423.318		245	739.507	178.161
	246	393.74	527.477		246	1600.58	419.492		246	729.908	177.782
	247	392.156	519.866		247	1592.08	415.686		247	716.792	177.907
	248	392.527	513.622		248	1566.88	411.242		248	704.691	178.702
	249	394.131	507.999		249	1541.6	409.865		249	695.557	178.432
	250	394.197	505.15		250	1522.05	410.616		250	688.519	176.981
	251	394.364	500.504		251	1514.02	411.452		251	683.094	179.504
	252	392.302	495.372		252	1510.11	410.888		252	678.37	179.449
	253	391.386	491.023		253	1492.29	407.32		253	668.016	177.311
	254	390.989	485.788		254	1464.65	403.824		254	658.044	179.025
	255	391.636	480.844		255	1429.06	400.611		255	649.395	178.946
	256	392.029	476.336		256	1396.83	400.297		256	641.394	178.84
	257	392.515	473.894		257	1375.41	401.716		257	637.863	178.185
	258	392.004	470.993		258	1363.39	401.361		258	633.732	178.504
	259	391.028	466.508		259	1344.85	401.972		259	629.689	179.626
	260	389.512	462.659		260	1321.49	397.5		260	623.508	178.986
	261	389.767	457.361		261	1290	395.173		261	614.014	179.243
	262	389.682	453.662		262	1252.65	392.442		262	605.476	178.609
	263	391.147	451.246		263	1222.51	392.044		263	600.861	177.189
	264	391.685	448.909		264	1202.38	394.72		264	597.9	177.753
	265	390.288	446.876		265	1187.97	395.283		265	595.495	178.146
	266	389.164	443.057		266	1172.52	394.505		266	592.125	177.372
	267	388.064	440.048		267	1148.41	389.609		267	586.643	178.979
	268	388.164	435.368		268	1118.09	388.297		268	578.715	178.693
	269	389.552	431.971		269	1088.69	386.203		269	573.385	177.311
	270	391.042	429.45		270	1062.39	386.884		270	569.115	178.516
	271	390.81	429.312		271	1048.64	389.173		271	567.778	177.924
	272	389.246	427.853		272	1036.28	389.526		272	566.301	178.107
	273	388.658	424.236		273	1022.76	387.042		273	562.019	178.71
	274	388.438	421.353		274	998.966	383.471		274	557.399	177.531
	275	388.244	416.711		275	974.319	382.353		275	550.442	178.389
	276	388.971	415.123		276	949.338	380.909		276	547.164	177.829
	277	390.39	414.144		277	931.616	382.789		277	546.243	178.121
	278	389.907	412.777		278	922.819	384.704		278	544.39	178.909
	279	388.388	411.189		279	913.239	384.457		279	541.827	177.416
	280	387.373	409.154		280	903.255	381.843		280	537.877	179.543
	281	387.798	406.029		281	882.051	378.975		281	534.535	177.018
	282	387.736	402.452		282	861.541	377.223		282	528.646	177.901
	283	389.3	400.993		283	841.567	377.379		283	525.548	177.482
	284	389.356	400.112		284	827.988	378.726		284	525.842	176.636
	285	388.701	398.961		285	823.612	380.809		285	524.702	177.317
	286	387.46	397.266		286	816.663	380.124		286	524.302	179.195
	287	385.954	395.231		287	805.749	377.271		287	520.181	178.126
	288	385.771	392.608		288	789.772	373.847		288	515.788	179.218
	289	387.274	390.435		289	771.588	374.065		289	511.901	177.405
	290	387.731	388.576		290	758.588	374.415		290	509.531	178.642
	291	388.768	388.833		291	752.671	376.725		291	509.091	177.986
	292	387.365	387.339		292	748.107	377.706		292	508.306	178.401
	293	386.818	386.585		293	741.807	375.87		293	506.561	179.821
	294	385.404	384.302		294	731.886	373.254		294	504.936	179.802
	295	386.331	381.888		295	716.742	371.042		295	501.291	180.154
	296	387.033	379.495		296	704.772	369.506		296	497.161	177.504
	297	388.322	380.61		297	694.057	372.1		297	496.963	179.095
	298	389.213	380.025		298	688.589	373.883		298	497.07	177.346
	299	451.841	379.111		299	686.48	373.595		299	496.521	179.105
	300	536.046	377.211		300	683.854	372.149		300	494.132	178.998
	301	608.128	375.287		301	672.481	369.58		301	489.573	177.689
	302	672.189	373.645		302	662.363	368.324		302	488.045	178.656
	303	735.99	372.698		303	650.645	368.091		303	484.715	178.79
	304	791.526	371.956		304	643.925	369.668		304	485.731	177.757
	305	837.603	372.113		305	642.104	371.201		305	485.788	178.189
	306	877.179	370.638		306	640.114	372.005		306	485.239	178.068
	307	913.632	369.449		307	637.769	369.125		307	482.501	178.646
	308	949.46	367.782		308	627.037	367.206		308	479.969	177.663
	309	986.235	366.168		309	617.473	365.901		309	477.213	177.035
	310	1021.7	365.969		310	608.755	365.602		310	476.438	177.019
	311	1054.54	365.874		311	605.417	368.618		311	477	178.066
	312	1079.89	365.409		312	605.679	369.837		312	476.887	178.982
	313	1103.04	365.059		313	605.125	369.898		313	477.272	179.3
	314	1125.58	362.296		314	599.37	367.151		314	475.33	178.302
	315	1153.01	361.408		315	590.857	364.214		315	471.298	178.885
	316	1178.76	359.996		316	583.26	363.956		316	469.836	179.516
	317	1207.69	359.633		317	576.521	365.831		317	468.092	178.119
	318	1230.56	359.936		318	575.97	366.685		318	469.588	178.212
	319	1245.04	359.281		319	575.92	368.211		319	469.248	177.716
	320	1256.41	358.758		320	574.936	365.86		320	468.618	179.086
	321	1270.59	356.976		321	571.245	364.401		321	467.089	178.663
	322	1286.11	356.2		322	562.405	362.241		322	464.917	177.652
	323	1300.8	355.471		323	555.945	362.237		323	463.621	178.325
	324	1309.62	355.257		324	551.103	363.795		324	462.382	178.202
	325	1308.42	355.416		325	551.608	366.477		325	462.371	177.72
	326	1297.55	354.77		326	552.096	366.677		326	465.097	178.123
	327	1291.72	353.693		327	551.682	365.303		327	460.88	178.693
	328	1276.85	351.834		328	546.588	362.913		328	459.205	177.206
	329	1267.77	351.018		329	540.234	360.985		329	457.047	178.329
	330	1257.43	350.51		330	533.821	361.421		330	455.312	176.477
	331	1240.81	350.47		331	531.597	363.526		331	457.194	177.086
	332	1218.59	350.474		332	533.059	364.624		332	457.227	178.87
	333	1195.5	350.698		333	533.781	364.791		333	457.974	177.84
	334	1168.31	348.966		334	532.334	362.723		334	454.898	179.239
	335	1148.08	347.868		335	527.921	360.821		335	452.938	178.471
	336	1128.26	346.39		336	520.796	359.767		336	451.118	177.753
	337	1106.83	346.265		337	516.74	359.837		337	451.413	177.757
	338	1080.55	346.923		338	517.411	363.606		338	451.578	177.689
	339	1063.11	346.939		339	517.985	364.113		339	452.273	178.418
	340	1033.25	347.182		340	519.73	364.482		340	453.306	177.739
	341	1009.58	345.811		341	517.121	361.453		341	451.403	177.895
	342	979.622	344.145		342	512.341	359.413		342	448.365	177.955
	343	972.431	343.653		343	507.679	357.958		343	448.177	177.617
	344	952.032	343.317		344	503.526	360.335		344	446.928	177.128
	345	926.039	344.484		345	505.084	362.02		345	448.146	178.36
	346	895.626	344.832		346	507.133	363.337		346	449.048	177.679
	347	883.713	343.892		347	507.383	362.004		347	448.088	178.128
	348	861.082	342.042		348	505.044	358.452		348	446.726	176.749
	349	844.569	341.816		349	500.724	358.112		349	444.529	178.033
	350	819.073	340.786		350	493.923	357.15		350	443.707	178.516
	351	818.406	341.566		351	493.102	359.93		351	444.199	177.486
	352	798.445	342.567		352	494.94	362.13		352	445.092	178.152
	353	779.425	341.529		353	496.321	362.29		353	444.76	178.543
	354	754.065	341.294		354	496.929	360.361		354	444.523	177.946
	355	749.433	339.627		355	492.86	358.621		355	443.013	178.757
	356	737.125	338.399		356	488.294	356.39		356	441.999	178.453
	357	722.701	338.501		357	484.913	357.168		357	441.553	176.525
	358	707.801	339.346		358	484.295	358.981		358	441.632	177.84
	359	700.848	340.349		359	485.4	361.412		359	444.223	177.831
	360	685.638	339.531		360	488.665	361.814		360	442.254	177.461
	361	670.568	338.743		361	487.493	358.044		361	441.774	178.57
	362	663.944	337.446		362	484.395	356.594		362	440.481	178.831
	363	649.701	336.274		363	479.443	355.07		363	438.145	177.405
	364	649.673	337.77		364	477.168	357.755		364	436.964	178.525
	365	637.389	337.762		365	477.274	359.204		365	439.01	177.64
	366	624.456	338.041		366	480.087	360.871		366	439.382	178.531
	367	616.655	337.858		367	481.316	359.924		367	440.173	178.971
	368	608.03	337.15		368	481.363	357.676		368	438.875	178.504
	369	597.841	335.376		369	476.724	355.984		369	438.412	178.364
	370	595.057	336.04		370	473.15	355.98		370	435.878	177.23
	371	583.136	336.125		371	470.621	357.227		371	436.977	177.496
	372	584.391	336.362		372	473.078	359.164		372	438.76	177.584
	373	572.601	336.385		373	475.942	359.869		373	439.077	177.626
	374	564.75	336.563		374	477.133	358.827		374	437.697	178.481
	375	552.529	335.184		375	474.669	356.072		375	436.842	177.418
	376	554.321	333.372		376	472.374	355.463		376	436.264	177.677
	377	550.177	333.522		377	468.131	356.325		377	434.916	178.331
	378	542.898	334.604		378	466.555	357.671		378	436.209	178.733
	379	538.527	335.384		379	469.157	359.536		379	436.185	178.113
	380	528.301	334.717		380	472.022	359.983		380	438.757	178.393
	381	525.858	334.2		381	473.617	357.834		381	437.806	179.068
	382	521.482	333.452		382	469.56	356.076		382	436.062	179.054
	383	516.955	333.095		383	466.325	355.261		383	434.004	178.844
	384	512.707	332.511		384	463.708	356.622		384	434.462	177.529
	385	511.857	334.174		385	463.456	366.876		385	437.03	176.434
	386	500.883	334.249		386	466.073	417.585		386	437.746	177.611
	387	500.539	334.211		387	469.528	466.204		387	438.44	178.144
	388	495.334	333.056		388	467.236	509.497		388	437.042	178.465
	389	492.095	332.54		389	463.853	548.043		389	457.637	178.362
	390	487.894	331.871		390	460.783	586.131		390	570.401	178.556
	391	488.752	332.537		391	458.566	626.433		391	684.374	177.455
	392	480.124	333.339		392	459.754	664.614		392	797.005	178.01
	393	482.665	333.795		393	463.411	701.108		393	907.409	177.716
	394	476.814	332.463		394	464.861	729.062		394	1004.57	177.893
	395	473.08	332.537		395	463.997	751.229		395	1092.58	178.136
	396	469.906	331.205		396	459.018	772.988		396	1174.06	177.905
	397	467.569	331.384		397	456.229	795.464		397	1243.09	177.776
	398	467.948	331.579		398	454.679	827.342		398	1317.51	177.691
	399	460.548	332.384		399	457.792	853.618		399	1386.65	178.34
	400	461.95	332.513		400	460.515	874.083		400	1455.07	179.794
	401	458.283	332.701		401	461.393	887.605		401	1504.02	178.523
	402	455.343	331.685		402	459.203	900.213		402	1550.01	179.197
	403	449.111	330.508		403	455.888	911.507		403	1592.49	179.366
	404	455.096	330.753		404	452.734	930.638		404	1634.82	178.232
	405	452.163	331.494		405	452.459	953.478		405	1683.14	178.068
	406	448.593	331.87		406	455.741	972.291		406	1731.82	178.451
	407	441.532	331.717		407	457.723	985.881		407	1775.99	178.113
	408	444.217	331.305		408	458.852	988.791		408	1806.95	178.051
	409	442.455	330.641		409	454.911	992.224		409	1834.59	177.636
	410	439.73	329.508		410	451.57	1000.15		410	1861.06	177.364
	411	436.461	330.451		411	449.669	1011.41		411	1896.64	177.539
	412	439.165	332.075		412	450.79	1028.3		412	1931.29	178.597
	413	436.454	332.09		413	454.302	1037.57		413	1964.83	179.498
	414	430.722	332.493		414	456.371	1035.21		414	1997.88	178.732
	415	430.98	333.571		415	454.989	1030.21		415	2009.9	178.905
	416	429.478	333.436		416	452.178	1019.78		416	2021.75	178.477
	417	430.192	389.052		417	449.021	1014.47		417	2031.12	177.949
	418	426.893	475.584		418	446.966	1011.84		418	2045.56	178.986
	419	428.129	551.565		419	449.461	1004.73		419	2063.9	178.572
	420	425.226	623.467		420	452.267	989.85		420	2064.99	178.356
	421	420.882	686.94		421	454.632	968.442		421	2056.76	178.648
	422	421.693	744.326		422	452.355	939.783		422	2037.36	178.523
	423	417.654	798.002		423	448.689	917.838		423	2007.28	178.681
	424	421.151	846.003		424	446.15	895.776		424	1979.15	178.191
	425	419.45	896.058		425	445.503	880.403		425	1960.35	177.716
	426	415.261	942.843		426	448.124	866.428		426	1938.21	178.887
	427	417.078	984.779		427	451.08	845.414		427	1914.32	177.942
	428	414.899	1018.48		428	452.528	819.713		428	1876.65	178.418
	429	412.648	1052.15		429	449.577	794.44		429	1833.66	178.514
	430	411.595	1081.74		430	446.763	770.89		430	1789.92	179.578
	431	413.44	1117.92		431	444.174	756.001		431	1753.07	178.323
	432	412.693	1152.06		432	444.734	744.233		432	1729.9	178.14
	433	407.964	1186.8		433	447.407	731.039		433	1704.02	179.416
	434	408.892	1217.76		434	449.839	714.963		434	1665.81	179.973
	435	406.419	1241.19		435	451.053	693.743		435	1620.54	178.056
	436	403.04	1265.38		436	448.787	674.718		436	1579.81	178.805
	437	407.376	1289.29		437	444.655	661.144		437	1535.47	177.704
	438	405.941	1315.26		438	443.4	651.032		438	1504.61	178.451
	439	404.93	1346.69		439	444.648	643.509		439	1471.68	177.792
	440	404.888	1373.6		440	448.406	635.778		440	1443.08	177.868
	441	400.912	1393.35		441	450.6	621.639		441	1415.23	178.695
	442	401.949	1412.25		442	449.731	606.38		442	1369.6	177.803
	443	400.341	1427.77		443	448.035	593.979		443	1333.73	178.047
	444	399.592	1444.04		444	444.769	584.097		444	1298.54	179.123
	445	402.707	1464.15		445	442.458	579.914		445	1272.68	178.988
	446	401.932	1483.26		446	446.092	575.43		446	1247.73	178.451
	447	397.281	1496.98		447	449.294	568.162		447	1223.67	178.728
	448	397.954	1500.71		448	451.968	558.429		448	1193.25	178.171
	449	397.107	1503.79		449	451.148	545.841		449	1164.06	178.125
	450	397.588	1498		450	448.234	538.295		450	1135.06	177.794
	451	393.667	1490.65		451	497.707	533.073		451	1108.73	176.866
	452	399.398	1485.84		452	592.994	529.269		452	1086.8	177.765
	453	398.206	1476.76		453	677.259	526.928		453	1069.03	177.617
	454	396.007	1459.59		454	759.638	521.585		454	1049.45	177.912
	455	392.397	1435.7		455	833.786	512.318		455	1023.14	178.675
	456	393.922	1416.17		456	891.719	504.839		456	999.238	178.399
	457	394.783	1388.38		457	943.578	498.186		457	977.137	177.837
	458	393.17	1370.99		458	989.318	495.011		458	957.897	178.977
	459	395.727	1349.71		459	1037.54	495.012		459	944.466	177.027
	460	391.919	1329.24		460	1089.69	491.468		460	929.524	177.737
	461	393.311	1303.92		461	1138.39	486.859		461	912.705	179.521
	462	392.45	1274.72		462	1178.88	480.633		462	894.992	178.679
	463	391.134	1242.34		463	1201.82	473.226		463	874.752	178.366
	464	391.993	1216.39		464	1223.38	469.964		464	854.645	177.356
	465	393.095	1194.82		465	1248.5	468.562		465	844.159	177.809
	466	390.89	1171.95		466	1285.64	467.617		466	833.471	177.918
	467	392.945	1148.26		467	1321.15	466.64		467	822.235	177.732
	468	390.159	1122.29		468	1356.77	460.493		468	808.344	178.553
	469	386.735	1093.62		469	1379.16	454.685		469	794.412	177.348
	470	390.332	1069.01		470	1391.08	450.852		470	776.492	177.58
	471	389.991	1040.07		471	1403.19	448.046		471	764.314	178.117
	472	388.858	1022.44		472	1420.24	447.761		472	757.804	177.356
	473	391.534	1002.74		473	1451.53	448.257		473	744.905	177.726
	474	387.731	983.982		474	1483.94	445.827		474	738.873	178.103
	475	388.158	958.137		475	1513.98	440.616		475	726.606	179.054
	476	387.769	935.219		476	1520.52	436.72		476	715.04	177.582
	477	387.764	911.204		477	1525.97	432.667		477	703.445	178.681
	478	387.91	893.141		478	1528.12	431.711		478	694.733	178.235
	479	389.624	876.802		479	1541	432.663		479	689.301	178.125
	480	385.571	861.656		480	1563.26	432.109		480	683.371	178.307
	481	387.988	843.464		481	1581.02	431.857		481	675.048	177.64
	482	386.364	825.104		482	1587.66	425.66		482	665.228	177.928
	483	383.654	804.791		483	1571.24	422.174		483	655.127	177.792
	484	387.068	787.816		484	1548.51	419.38		484	645.911	177.844
	485	387.198	773.27		485	1528.09	418.901		485	639.439	177.815
	486	383.951	760.902		486	1519.12	420.731		486	635.713	178.088
	487	387.744	748.448		487	1517.39	420.009		487	631.396	177.784
	488	385.116	734.724		488	1509.24	417.079		488	626.128	179.313
	489	384.29	719.232		489	1488.28	414.075		489	617.135	179.255
	490	384.451	704.211		490	1454.59	410.283		490	609.799	178.825
	491	385.923	691.912		491	1417.55	408.054		491	602.867	178.089
	492	382.955	682.058		492	1390.22	409.733		492	597.328	178.447
	493	387.99	672.573		493	1378.45	410.246		493	595.175	177.123
	494	385.571	662.334		494	1362.3	409.713		494	592.716	177.434
	495	384.896	650.821		495	1348.8	407.338		495	586.861	178.823
	496	380.664	639.125		496	1317.34	402.79		496	580.051	177.728
	497	386.229	628.242		497	1283.3	400.585		497	572.579	177.751
	498	386.588	618.328		498	1251.69	399.492		498	567.436	177.045
	499	383.95	612.358		499	1223.5	401.619		499	566.534	177.702
	500	387.403	604.913		500	1208.72	402.75		500	562.92	177.827
	501	383.661	596.988		501	1194.94	401.762		501	561.738	177.918
	502	385.484	587.825		502	1177.15	398.43		502	554.901	179.025
	503	385.132	579.348		503	1148.57	395.993		503	551.277	178.097
	504	385.622	570.178		504	1116.27	392.343		504	544.876	177.747
	505	386	562.587		505	1087	393.214		505	542.113	177.516
	506	386.228	557.991		506	1066.95	395.212		506	540.43	176.7
	507	381.22	551.638		507	1057.18	395.915		507	539.253	177.955
	508	385.42	546.512		508	1043.66	394.642		508	536.125	178.422
	509	383.994	538.446		509	1025.5	390.918		509	532.356	177.971
	510	383.251	531.173		510	997.947	388.618		510	527.804	177.712
	511	382.786	523.616		511	973.053	387.606		511	523.115	177.325
	512	385.219	519.376		512	951.621	388.592		512	521.921	177.613
	513	385.853	516.478		513	937.952	388.963		513	520.164	177.737
	514	380.652	513.411		514	928.267	391.415		514	519.482	178.949
	515	383.701	506.852		515	920.276	388.859		515	516.882	178.113
	516	382.455	501.746		516	901.956	385.983		516	512.861	177.516
	517	378.852	495.204		517	880.428	384.119		517	509.124	177.996
	518	383.665	489.923		518	861.385	382.044		518	506.463	178.605
	519	382.945	486.741		519	844.273	385.175		519	504.572	178.348
	520	380.682	482.276		520	836.129	385.486		520	505.119	177.551
	521	383.341	480.484		521	832.228	385.799		521	503.997	178.438
	522	381.674	475.993		522	822.967	383.345		522	501.968	177.735
	523	378.376	470.404		523	807.073	379.9		523	497.426	177.611
	524	387.126	464.945		524	786.859	378.511		524	493.551	177.749
	525	469.32	462.049		525	771.893	379.232		525	491.132	176.741
	526	550.578	459.631		526	761	381.143		526	492.333	178.331
	527	609.226	456.988		527	756.211	382.736		527	491.565	178.665
	528	683.259	453.606		528	751.693	381.766		528	490.725	178.07
	529	737.615	450.692		529	744.692	379.605		529	489.325	178.374
	530	788.297	445.19		530	730.568	377.412		530	485.672	177.763
	531	832.33	441.532		531	715.377	375.403		531	483.782	176.86
	532	880.396	440.535		532	703.159	375.906		532	480.373	178.51
	533	915.366	437.928		533	697.307	378.85		533	482.083	177.94
	534	954.115	437.817		534	695.82	379.675		534	481.633	178.613
	535	968.21	433.99		535	692.082	378.596		535	480.81	178.191
	536	1012.05	430.728		536	683.5	375.289		536	477.453	178.809
	537	1044.17	426.092		537	672.556	372.99		537	473.5	177.883
	538	1074.33	423.691		538	661.131	372.498		538	472.059	177.677
	539	1096.73	421.778		539	650.469	374.343		539	471.568	177.576
	540	1133.6	421.117		540	649.676	375.28		540	472.177	177.327
	541	1145.73	419.668		541	645.497	376.898		541	472.609	178.632
	542	1172.09	416.161		542	643.315	374.747		542	472.597	178.074
	543	1179.93	413.265		543	635.962	372.203		543	468.499	178.08
	544	1213.23	410.235		544	625.041	370.636		544	466.128	178.733
	545	1238.61	407.56		545	615.859	370.401		545	465.54	178.13
	546	1240.47	407.628		546	610.524	371.954		546	463.561	178.142
	547	1275.63	405.354		547	608.952	373.765		547	465.847	176.613
	548	1279.65	404.058		548	607.744	374.775		548	466.778	177.928
	549	1279.7	401.741		549	606.833	372.76		549	464.158	176.813
	550	1274.62	399.925		550	599.043	369.764		550	461.538	178.447
	551	1293.53	397.033		551	589.636	367.731		551	460.216	178.158
	552	1292.11	395.12		552	581.899	369.249		552	456.931	176.119
	553	1270.61	394.617		553	578.222	371.552		553	460.104	176.905
	554	1273.87	394.318		554	578.581	372.754		554	460.313	177.776
	555	1247.95	392.771		555	578.172	372.257		555	460.053	179.677
	556	1217.21	390.506		556	576.593	369.371		556	458.833	178.595
	557	1215.88	387.671		557	569.443	368.022		557	455.528	177.992
	558	1199.47	385.766		558	561.124	366.265		558	454.673	177.282
	559	1170.66	385.115		559	555.601	367.083		559	453.906	178.768
	560	1165.46	384.584		560	553.519	370.778		560	454.54	177.831
	561	1130.13	383.309		561	555.269	370.876		561	454.517	178.568
	562	1101.03	382.029		562	556.076	369.803		562	453.303	178.193
	563	1081.64	379.451		563	551.141	368.326		563	451.939	177.807
	564	1062.36	377.555		564	544.679	364.762		564	449.136	178.228
	565	1041.77	375.456		565	539.448	365.734		565	446.537	177.274
	566	999.408	375.688		566	533.922	367.312		566	447.078	178.016
	567	1001.79	375.341		567	533.642	369.503		567	448.215	179.035
	568	976.206	375.663		568	534.513	370.978		568	448.472	178.73
	569	947.731	372.108		569	534.998	368.592		569	448.743	179.064
	570	923.918	371.527		570	531.345	366.498		570	447.954	178.148
	571	905.099	369.196		571	524.79	365.295		571	444.161	176.714
	572	870.805	367.966		572	519.113	364.776		572	442.188	177.51
	573	874.669	367.486		573	517.179	367.655		573	443.323	177.658
	574	855.196	366.762		574	518.182	368.888		574	444.188	179.142
	575	831.123	366.651		575	519.87	369.038		575	446.922	178.63
	576	801.198	364.982		576	519.54	366.585		576	444.445	178.901
	577	789.24	363.309		577	514.045	364.191		577	441.801	177.949
	578	782.062	362.059		578	508.896	363.433		578	440.809	178.082
	579	769.852	361.375		579	503.389	364.083		579	440.401	177.718
	580	745.233	361.106		580	501.986	367.132		580	440.843	177.368
	581	739.377	360.177		581	504.887	367.143		581	443.279	178.815
	582	723.805	359.683		582	507.22	366.932		582	442.035	177.327
	583	701.898	358.602		583	504.776	365.359		583	440.023	178.358
	584	698.004	356.956		584	500.295	362.87		584	439.578	177.407
	585	688.65	356.024		585	495.871	362.384		585	437.161	178.058
	586	680.117	355.858		586	491.571	363.593		586	437.725	178.839
	587	661.324	356.942		587	492.071	366.118		587	438.568	178.222
	588	649.347	356.399		588	494.723	366.73		588	439.049	178.107
	589	647.594	355.176		589	496.422	365.685		589	440.118	178.661
	590	635.897	353.172		590	493.354	362.674		590	438.404	177.912
	591	624.863	352.278		591	488.555	361.706		591	435.808	177.93
	592	608.685	351.145		592	484.718	361.133		592	435.039	177.518
	593	614.681	352.242		593	481.816	363.496		593	435.588	176.712
	594	607.013	351.97		594	484.214	364.437		594	437.224	177.543
	595	596.344	351.508		595	487.044	365.397		595	437.95	177.484
	596	585.184	350.968		596	487.118	363.605		596	436.533	178.578
	597	571.138	349.445		597	483.993	361.121		597	434.616	177.154
	598	574.12	346.865		598	478.881	360.791		598	433.724	177.623
	599	570.789	347.329		599	475.878	360.78		599	432.279	177.827
	600	560.368	348.213		600	475.34	362.482		600	435.45	177.315
	601	551.312	347.541		601	477.317	364.524		601	434.877	177.782
	602	549.946	348.29		602	479.335	364.249		602	435.386	178.453
	603	537.002	346.409		603	479.126	361.787		603	435.099	177.527
	604	537.244	345.091		604	475.782	361.058		604	433.575	177.442
	605	528.109	343.859		605	472.266	359.337		605	431.274	177.607
	606	529.402	343.93		606	469.351	360.59		606	432.503	176.543
	607	518.192	344.338		607	469.573	363.11		607	432.773	178.29
	608	516.751	344.871		608	472.206	364.156		608	435.388	177.475
	609	512.884	343.529		609	475.991	363.457		609	434.516	179.177
	610	507.972	342.724		610	473.744	361.036		610	433.667	178.648
	611	501.992	342.116		611	469.917	359.372		611	432.174	178.578
	612	501.752	339.958		612	465.826	359.308		612	429.962	178.426
	613	491.167	340.748		613	464.516	361.145		613	431.886	177.566
	614	494.468	341.256		614	466.418	363.168		614	433.203	177.73
	615	490.917	341.107		615	468.723	363.075		615	435.432	179.123
	616	483.777	339.914		616	470.837	361.824		616	441.208	178.671
	617	480.813	339.059		617	468.59	359.953		617	524.238	178.895
	618	477.975	337.711		618	465.177	357.956		618	637.578	177.675
	619	474.329	337.821		619	461.932	359.033		619	744.811	178.309
	620	472.675	337.958		620	460.596	360.546		620	851.241	177.977
	621	469.371	338.653		621	462.008	362.057		621	951.771	176.862
	622	459.29	337.54		622	464.665	362.687		622	1050.04	177.803
	623	462.459	337.583		623	465.841	361.704		623	1127.81	176.839
	624	459.872	335.841		624	463.044	358.065		624	1202.98	177.436
	625	458.026	335.398		625	459.516	357.99		625	1269.7	177.955
	626	451.621	335.111		626	456.181	356.785		626	1330.24	177.426
	627	449.689	337.01		627	455.929	361.118		627	1397.93	179.051
	628	453.359	336.559		628	459.555	360.852		628	1456.06	177.554
	629	448.986	336.076		629	461.956	362.012		629	1508.84	179.037
	630	442.45	335.923		630	461.069	359.327		630	1555.22	178.726
	631	438.323	334.053		631	458.087	357.792		631	1589.32	178.535
	632	444.114	333.258		632	454.823	357.503		632	1627.91	176.942
	633	442.427	334.077		633	453.533	358.401		633	1668.04	178.512
	634	441.227	334.681		634	454.447	361.191		634	1710.71	177.759
	635	431.744	334.173		635	455.814	361.908		635	1753.91	177.827
	636	436.048	334.243		636	457.883	360.812		636	1789.62	178.278
	637	432.854	333.502		637	457.469	359.431		637	1814.05	178.019
	638	431.641	331.958		638	454.289	356.923		638	1835.11	179.064
	639	424.782	332.646		639	451.843	356.476		639	1860.26	177.418
	640	431.748	332.857		640	449.112	359.394		640	1886.54	178.761
	641	430.085	332.188		641	451.02	360.309		641	1923.54	178.551
	642	422.725	333.526		642	454.503	362.01		642	1948.59	176.947
	643	418.364	332.246		643	456.406	359.824		643	1969.36	178.924
	644	423.574	331.106		644	454.953	357.913		644	1979.79	178.185
	645	422.169	331.377		645	451.478	355.903		645	1982.76	176.825
	646	417.349	330.203		646	447.839	357.461		646	1988.14	177.286
	647	417.238	331.078		647	447.69	358.363		647	2002.1	177.652
	648	420.709	331.68		648	450.249	360.234		648	2004.8	178.169
	649	418.718	331.495		649	452.521	360.454		649	2003.77	178.368
	650	413.704	331.583		650	454.245	358.346		650	1978.96	178.15
	651	408.769	330.218		651	451.252	356.889		651	1949.08	177.249
	652	415.431	330.163		652	448.151	356.014		652	1918.2	177.539
	653	415.424	329.379		653	445.937	357.453		653	1887.68	176.582
	654	409.583	330.774		654	445.925	359.286		654	1865.08	177.57
	655	408.719	330.432		655	449.015	360.085		655	1843.12	178.965
	656	411.469	330.872		656	451.8	360.587		656	1807.34	177.961
	657	408.558	330.354		657	452.305	357.633		657	1767.09	177.37
	658	403.767	329.48		658	449.276	356.492		658	1725.35	178.712
	659	405.945	328.583		659	445.44	355.972		659	1682.23	178.303
	660	409.134	329.962		660	443.51	357.375		660	1648.27	178.245
	661	405.279	330.276		661	445.651	360.28		661	1617.94	178.169
	662	407.437	330.678		662	448.006	360.503		662	1582.77	178.455
	663	405.999	330.371		663	450.596	359.32		663	1552.26	178.947
	664	401.031	329.892		664	450.258	357.483		664	1505.91	177.907
	665	399.396	329.087		665	446.498	356.972		665	1466.98	177.609
	666	404.136	328.521		666	443.166	356.13		666	1428.64	177.934
	667	405.109	329.287		667	442.497	359.033		667	1396.93	177.539
	668	400.981	330.651		668	445.66	361.069		668	1370.46	177.123
	669	402.405	330.675		669	448.032	361.371		669	1339.98	177.479
	670	398.933	330.587		670	450.103	360.707		670	1303.24	178.134
	671	399.629	329.761		671	447.474	399.781		671	1268.35	177.636
	672	393.772	328.615		672	445.005	457.74		672	1231.21	177.87
	673	401.571	328.74		673	443.142	508.382		673	1202.26	177.65
	674	400.109	329.761		674	443.571	557.602		674	1179.67	177.498
	675	395.249	329.848		675	446.057	607.25		675	1157.45	178.763
	676	392.389	330.625		676	448.803	650.881		676	1132.34	178.455
	677	396.926	330.141		677	449.495	687.605		677	1106.33	179.045
	678	395.601	330.311		678	447.339	722.536		678	1074.86	177.603
	679	393.153	329.073		679	444.241	756.544		679	1046.89	178.222
	680	396.889	330.141		680	442.908	794.294		680	1024.84	177.381
	681	390.218	331.275		681	444.134	833.525		681	1006.42	177.319
	682	391.274	350.925		682	447.462	866.451		682	990.898	178.286
	683	394.16	437.386		683	450.366	894.346		683	972.002	177.837
	684	389.316	514.788		684	450.117	915.367		684	949.106	179.593
	685	391.981	584.484		685	447.251	935.687		685	925.871	179.169
	686	392.93	650.956		686	443.733	957.907		686	905.129	177.605
	687	394.2	715.557		687	442.827	987.057		687	890.981	177.636
	688	391.188	773.996		688	445.249	1013.58		688	877.648	177.848
	689	393.212	829.098		689	481.689	1039.59		689	865.818	178.099
	690	386.962	877.809		690	581.991	1051.72		690	850.456	178.165
	691	391.039	919.64		691	663.829	1061.94		691	832.032	178.076
	692	390.968	960.929		692	730.887	1073.09		692	813.957	178.054
	693	391.682	1000.22		693	796.538	1084.82		693	799.118	177.352
	694	389.078	1039.83		694	857.267	1110.46		694	789.608	178.004
	695	392.626	1078.65		695	922.024	1127.87		695	779.712	176.949
	696	390.031	1115.81		696	981.89	1136.65		696	769.758	177.737
	697	384.962	1145.32		697	1033.58	1134.35		697	757.072	178.344
	698	388.266	1173.69		698	1071.36	1125.16		698	743.2	178.216
	699	387.233	1203.51		699	1102.43	1120.43		699	730.385	176.947
	700	383.33	1231.96		700	1132.09	1118.21		700	719.749	178.045
	701	389.878	1266.51		701	1167.07	1118.72		701	713.548	176.533
	702	388.442	1298.74		702	1208.44	1111.11		702	706.089	177.87
	703	386.969	1327.45		703	1249.43	1096.28		703	697.637	178.496
	704	381.923	1349.59		704	1279.71	1068.33		704	686.629	178.243
	705	385.012	1368.55		705	1296.57	1042.23		705	673.644	178.387
	706	387.813	1388.76		706	1310.54	1021.13		706	665.403	175.984
	707	387.885	1418.49		707	1327.95	1007.46		707	659.114	177.477
	708	385.217	1441.12		708	1357.52	994.452		708	652.493	178.148
	709	383.85	1466.31		709	1391.24	975.173		709	648.952	178.411
	710	385.638	1480.2		710	1421.57	948.439		710	641.864	177.874
	711	384.83	1493.85		711	1443.63	922.052		711	632.495	178.195
	712	383.991	1501.26		712	1451.53	893.747		712	625.098	178.342
	713	379.136	1508.81		713	1453.38	874.079		713	616.548	178.315
	714	386.706	1515.82		714	1466.28	860.074		714	611.026	178.691
	715	386.078	1520.32		715	1493.19	847.579		715	609.432	178.259
	716	384.545	1516.27		716	1520.64	829.382		716	604.059	178.07
	717	380.808	1505.64		717	1542.03	803.748		717	598.696	177.805
	718	382.25	1487.75		718	1545.49	780.729		718	592.343	177.996
	719	381.743	1466.92		719	1539.88	760.394		719	584.167	177.753
	720	377.885	1449.64		720	1532.36	744.193		720	579.688	177.389
	721	379.887	1436.05		721	1526.33	733.681		721	578.101	178.21
	722	383.514	1420.43		722	1532.64	724.659		722	573.887	178.136
	723	382.068	1396.69		723	1534.73	708.679		723	570.394	178.103
	724	380.677	1372.77		724	1526.07	688.482		724	564.347	179.389
	725	376.737	1346.65		725	1501.22	670.39		725	560.887	178.553
	726	379.42	1316.24		726	1471.57	656.219		726	554.385	177.337
	727	382.51	1294.51		727	1441.58	648.361		727	550.196	177.084
	728	382.955	1273.7		728	1423.22	641.055		728	548.954	177.212
	729	381.006	1253.03		729	1414.95	631.503		729	547.527	178.2
	730	374.747	1225.19		730	1402.44	620.939		730	544.938	179.481
	731	379.95	1198.63		731	1379.69	604.914		731	539.698	177.169
	732	380.037	1170.47		732	1345.42	592.679		732	536.197	177.755
	733	380.698	1143.42		733	1311.24	584.396		733	530.715	177.846
	734	381.179	1121		734	1281.8	578.179		734	527.868	177.436
	735	378.343	1099.8		735	1263.53	576.124		735	527.389	177.938
	736	382.596	1080.28		736	1250.46	568.626		736	525.364	178.2
	737	380.631	1053.54		737	1234.34	558.025		737	524.942	178.893
	738	378.664	1029.11		738	1207.05	548.826		738	519.412	176.903
	739	374.589	1003.62		739	1172.11	538.197		739	515.964	178.93
	740	382.446	981.763		740	1140.27	533.197		740	511.696	177.481
	741	383.765	963.782		741	1116.1	531.224		741	511.53	178.117
	742	382.252	944.199		742	1102.99	528.016		742	511.193	179.323
	743	380.908	925.372		743	1089.04	522.826		743	509.699	177.679
	744	379.221	904.988		744	1072.77	513.431		744	506.476	178.428
	745	379.124	882.463		745	1049.06	505.778		745	504.28	178.34
	746	374.304	862.087		746	1018.46	500.191		746	498.271	177.543
	747	382.488	845.57		747	991.93	496.849		747	497.851	177.803
	748	383.451	830.755		748	974.352	495.207		748	497.792	178.329
	749	382.717	816.324		749	963.887	494.048		749	497.078	177.16
	750	384.522	799.751		750	953.38	489.022		750	495.83	178.107
	751	457.238	783.585		751	940.026	480.873		751	494.387	178.3
	752	542.181	763.9		752	917.092	474.27		752	490.206	177.56
	753	613.642	748.843		753	893.165	470.099		753	487.162	176.761
	754	678.705	736.218		754	873.891	467.602		754	485.655	177.348
	755	737.917	726.588		755	861.553	467.565		755	485.76	177.488
	756	785.004	712.705		756	856.146	465.98		756	486.808	177.7
	757	818.477	700.56		757	847.999	462.511		757	486.122	178.484
	758	867.321	687.504		758	834.164	455.357		758	483.162	177.018
	759	905.585	673.511		759	814.556	448.381		759	479.632	178.346
	760	942.039	660.947		760	795.205	443.246		760	477.338	178.233
	761	964.401	652.344		761	781.515	440.196		761	477.446	177.71
	762	999.807	644.407		762	776.881	446.372		762	477.794	177.837
	763	1039.3	635.684		763	770.514	452.747		763	478.021	178.516
	764	1061.22	625.584		764	764.554	449.044		764	478.055	178.309
	765	1082.95	613.258		765	751.296	444.449		765	472.851	177.735
	766	1110.06	601.615		766	736.135	439.929		766	471.75	178.733
	767	1138.38	593.95		767	721.125	438.389		767	469.439	177.835
	768	1145	587.816		768	711.064	440.019		768	468.664	177.591
	769	1170.7	581.571		769	708.045	438.995		769	469.482	177.889
	770	1206.42	573.848		770	704.938	435.863		770	470.469	178.51
	771	1219.78	564.872		771	698.442	432.333		771	468.565	178.393
	772	1234.03	557.001		772	686.505	427.512		772	466.062	177.78
	773	1250.82	548.272		773	674.156	424.169		773	464.162	178.827
	774	1268.57	543.294		774	662.911	424.719		774	463.227	177.697
	775	1281.82	536.449		775	656.977	425.332		775	464.067	177.623
	776	1282.79	531.756		776	655.717	425.381		776	464.953	178.704
	777	1275.79	525.309		777	652.974	422.506		777	464.124	178.967
	778	1265.98	519.031		778	647.623	418.276		778	461.382	178.342
	779	1259.21	511.774		779	636.922	414.853		779	460.703	179.008
	780	1249.28	506.207		780	626.378	413.386		780	457.754	178.348
	781	1241.63	502.174		781	617.213	413.4		781	457.96	177.51
	782	1231.07	497.895		782	614.127	414.91		782	457.703	176.586
	783	1196.97	494.801		783	612.799	415.159		783	459.755	179.132
	784	1167.61	489.493		784	611.042	411.394		784	458.181	177.56
	785	1164.64	484.097		785	606.109	408.06		785	455.849	178.475
	786	1146.68	478.542		786	596.589	404.992		786	454.5	177.286
	787	1127.96	473.838		787	588.575	403.34		787	452.298	178.276
	788	1109.03	470.867		788	582.554	403.841		788	451.366	177.899
	789	1086.72	467.579		789	581.788	404.869		789	453.738	177.288
	790	1060.32	463.67		790	581.277	405.285		790	454.238	177.535
	791	1032.52	460.249		791	579.481	402.392		791	453.146	178.603
	792	1006.16	454.57		792	573.777	398.552		792	451.38	177.722
	793	984.283	450.11		793	564.87	397.279		793	449.358	178.198
	794	946.752	446.337		794	557.396	395.336		794	448.722	178.261
	795	951.059	445.477		795	554.7	397.348		795	449.349	178.891
	796	929.651	443.466		796	555.502	397.795		796	449.858	177.516
	797	905.324	439.939		797	556.03	396.933		797	451.772	178.412
	798	879.673	436.572		798	553.853	393.999		798	448.876	177.854
	799	859.879	432.076		799	547.217	391.56		799	447.376	177.315
	800	844.335	429.758		800	539.408	389.782		800	445.261	178.027
	801	829.831	427.808		801	534.083	390.159		801	444.696	175.572
	802	813.827	425.465		802	531.978	391.764		802	446.879	177.51
	803	795.413	424.406		803	534.784	391.854		803	446.932	179.156
	804	774.853	421.687		804	535.042	391.567		804	447.445	179.22
	805	758.849	418.319		805	532.319	387.396		805	446.541	178.827
	806	746.19	415.045		806	526.06	385.163		806	444.614	178.389
	807	732.864	411.983		807	519.668	383.8		807	443.07	178.578
	808	723.306	409.997		808	516.083	384.949		808	444.272	178.183
	809	710.866	408.714		809	515.943	386.679		809	446.002	178.911
	810	697.126	408.04		810	517.942	386.345		810	445.683	179.15
	811	681.314	404.825		811	518.577	384.374		811	445.229	177.887
	812	668.931	402.876		812	515.307	382.145		812	444.081	177.891
	813	659.799	399.375		813	509.948	379.52		813	442.328	178.181
	814	652.404	397.543		814	505.136	379.233		814	441.183	177.905
	815	643.889	396.646		815	502.666	380.849		815	440.752	176.459
	816	634.593	396.301		816	503.892	382.169		816	443.114	178.095
	817	623.823	394.396		817	505.313	381.007		817	443.663	177.737
	818	613.86	391.836		818	505.989	379.496		818	442.779	177.086
	819	603.799	389.402		819	501.302	376.996		819	441.749	178.187
	820	597.478	387.09		820	496.715	376.132		820	439.133	177.121
	821	591.231	385.141		821	492.234	376.826		821	438.28	178.204
	822	584.537	385.794		822	491.028	377.962		822	440.292	176.73
	823	577.17	384.441		823	493.644	378.372		823	440.495	178.455
	824	565.686	383.494		824	495.259	378.146		824	441.709	177.591
	825	559.981	381.546		825	494.819	375.371		825	441.282	178.113
	826	554.305	379.023		826	490.42	373.47		826	439.48	178.368
	827	550.39	376.276		827	485.316	372.389		827	436.526	177.77
	828	546.184	376.014		828	482.065	373.225		828	438.226	176.821
	829	540.592	375.455		829	482.759	375.531		829	437.392	177.37
	830	534.216	375.206		830	485.665	375.672		830	440.984	177.661
	831	527.334	373.664		831	487.215	374.267		831	439.913	178.154
	832	521.767	370.909		832	485.369	372.081		832	438.62	176.953
	833	517.488	369.244		833	479.785	369.523		833	437.734	177.136
	834	514.812	368.075		834	476.018	369.703		834	436.698	176.984
	835	511.676	367.234		835	473.476	371.866		835	437.858	178.636
	836	507.563	367.965		836	475.326	372.392		836	439.79	177.218
	837	501.996	366.376		837	477.08	373.385		837	440.557	178.488
	838	495.606	365.774		838	478.995	371.39		838	440.696	178.681
	839	491.701	362.492		839	476.71	369.332		839	438.95	178.366
	840	488.909	361.871		840	471.512	367.544		840	437.655	177.268
	841	487.556	360.343		841	468.601	367.443		841	437.796	176.765
	842	485.388	360.005		842	467.133	370.043		842	448.462	176.605
	843	481.657	359.766		843	468.017	371.214		843	547.874	178.247
	844	476.62	360.332		844	470.123	371.115		844	663.09	178.208
	845	472.734	357.427		845	471.466	367.864		845	767.018	178.858
	846	469.929	355.902		846	468.388	365.563		846	868.344	176.93
	847	467.918	354.987		847	464.028	365.073		847	961.575	177.097
	848	467.225	354.88		848	461.551	366.43		848	1049.68	177.8
	849	465.524	354.904		849	462.228	367.664		849	1138.57	178.111
	850	462.228	354.932		850	463.395	368.895		850	1219.24	176.735
	851	459.505	353.327		851	466.288	368.243		851	1289.94	177.737
	852	454.774	352.956		852	465.818	366.797		852	1349.18	177.743
	853	453.191	351.853		853	462.351	363.319		853	1402.97	177.819
	854	452.992	349.219		854	457.99	363.169		854	1452.18	177.895
	855	452.36	349.652		855	455.578	364.538		855	1507.42	178.714
	856	449.964	350.156		856	456.777	367.1		856	1558.04	179.008
	857	447.619	349.609		857	458.812	367.623		857	1615.17	177.975
	858	444.344	348.701		858	461.721	366.042		858	1658.03	178.644
	859	441.271	347.362		859	460.255	364.318		859	1693.58	178.181
	860	441.432	346.015		860	457.152	361.528		860	1727.52	177.553
	861	440.046	345.006		861	453.718	361.693		861	1757.48	176.949
	862	440.693	345.84		862	451.392	363.903		862	1793.59	177.432
	863	438.616	345.942		863	453.745	365.708		863	1838.49	179.477
	864	436.089	346.096		864	455.954	365.561		864	1873.64	177.73
	865	433.331	344.205		865	458.099	363.836		865	1900.1	178.313
	866	431.732	343.135		866	455.273	361.817		866	1924.53	178.123
	867	431.251	342.091		867	452.538	360.25		867	1940.69	177.922
	868	431.728	341.792		868	450.227	361.047		868	1956.39	177.903
	869	430.688	342.459		869	448.593	363.715		869	1984.74	177.492
	870	429.368	342.482		870	450.825	364.273		870	2008.16	178.481
	871	426.544	341.644		871	453.118	363.419		871	2030.69	177.15
	872	424.55	340.802		872	455.041	361.713		872	2029.34	178.477
	873	422.867	339.199		873	452.15	360.119		873	2022.83	176.911
	874	423.372	338.964		874	448.525	359.563		874	2008.55	177.473
	875	423.685	338.61		875	445.525	360.672		875	1993.93	178.329
	876	423.138	339.376		876	446.82	362.924		876	1986.26	177.134
	877	420.926	339.707		877	449.197	363.877		877	1973.77	177.01
	878	418.995	338.854		878	451.55	363.551		878	1947.7	178.35
	879	416.571	337.529		879	451.449	361.008		879	1919.87	177.955
	880	415.401	335.779		880	447.406	359.046		880	1883.16	177.004
	881	416.293	335.621		881	445.455	358.211		881	1841.9	177.502
	882	416.811	335.124		882	442.855	360.566		882	1816.41	178.323
	883	415.654	336.639		883	443.977	362.567		883	1786.35	177.796
	884	413.595	336.364		884	447.01	362.53		884	1755.12	178.228
	885	411.406	336.073		885	448.987	361.752		885	1723.91	179.267
	886	410.048	334.706		886	447.563	359.696		886	1675.82	178.745
	887	410.117	334.016		887	444.601	357.678		887	1636.69	177.965
	888	409.984	333.357		888	442.344	358.251		888	1592.88	176.411
	889	410.479	333.724		889	441.075	360.651		889	1561.65	177.776
	890	410.243	333.374		890	442.686	360.486		890	1537.54	178.377
	891	408.46	334.505		891	445.413	360.79		891	1502.47	178.337
	892	406.521	333.488		892	446.725	356.146		892	1464.86	177.732
	893	405.212	332.842		893	444.814	348.167		893	1426.47	177.695
	894	404.859	331.331		894	441.71	347.643		894	1386.69	178.362
	895	406.331	330.673		895	437.673	347.628		895	1354.87	177.442
	896	405.777	332.084		896	438.085	348.82		896	1324.21	176.621
	897	405.655	332.477		897	441.498	346.966		897	1298.54	178.224
	898	403.348	331.962		898	443.192	348.23		898	1274.91	178.156
	899	401.771	331.157		899	444.695	348.464		899	1239.13	177.922
	900	401.595	330.403		900	441.346	348.531		900	1203.4	177.866
	901	402.704	330.036		901	438.433	347.376		901	1174.15	176.883
	902	402.785	329.769		902	437.113	347.539		902	1149.88	176.045
	903	402.911	331.246		903	437.289	346.365		903	1128.06	178.282
	904	401.598	331.334		904	440.812	347.298		904	1109.16	177.549
	905	399.176	331.217		905	442.582	347.612		905	1082.29	178.01
	906	398.372	329.695		906	442.535	347.629		906	1059.27	177.041
	907	397.305	329.689		907	439.711	347.536		907	1034.67	177.5
	908	398.465	328.547		908	436.564	347.185		908	1004.85	178.033
	909	398.962	329.837		909	435.988	346.194		909	988	176.307
	910	398.56	330.12		910	437.144	346.917		910	975.047	179.595
	911	396.894	330.665		911	440.155	346.221		911	957.078	177.661
	912	396.045	330.107		912	442.207	346.561		912	939.993	177.574
	913	395.317	329.648		913	441.584	346.683		913	914.549	178.097
	914	395.262	328.428		914	438.04	345.81		914	897.416	176.887
	915	396.527	327.801		915	435.81	346.515		915	880.008	178.235
	916	395.942	328.502		916	434.988	346.257		916	864.993	178.191
	917	396.207	329.642		917	439.056	346.735		917	855.53	177.772
	918	393.799	329.193		918	441.261	346.619		918	844.418	178.467
	919	392.311	327.955		919	442.291	346.836		919	825.434	178.63
	920	392.687	327.072		920	440.737	346.37		920	809.565	177.455
	921	392.426	327.225		921	437.203	346.761		921	794.101	176.704
	922	393.115	326.978		922	434.746	346.443		922	777.193	177.761
	923	394.233	328.167		923	435.483	345.714		923	771.546	177.545
	924	392.812	328.221		924	438.018	346.059		924	761.781	177.977
	925	391.034	328.156		925	442.075	345.754		925	752.349	177.765
	926	389.686	327.591		926	446.11	346.702		926	739.314	177.78
	927	389.38	326.112		927	520.807	345.65		927	725.687	177.901
	928	389.548	325.82		928	605.346	344.902		928	713.847	178.113
	929	391.022	326.11		929	678.453	345.645		929	704.938	177.632
	930	391.191	327.082		930	751.769	344.584		930	698.913	178.848
	931	389.005	326.73		931	825.454	344.789		931	693.087	177.784
	932	387.644	326.91		932	891.703	346.6		932	683.819	178.79
	933	387.41	326.369		933	948.082	344.665		933	674.657	177.198
	934	386.79	325.986		934	987.309	346.047		934	662.663	178.461
	935	388.266	325.365		935	1025.08	345.449		935	653.547	176.967
	936	389.115	325.699		936	1060.81	344.619		936	647.962	176.072
	937	388.828	327.464		937	1105.63	345.144		937	644.094	177.784
	938	387.919	327.339		938	1151.07	344.684		938	637.428	178.329
	939	386.673	326.447		939	1191.19	345.561		939	630.55	179.944
	940	385.77	325.929		940	1217.33	345.426		940	622.162	178.381
	941	385.63	324.761		941	1234.77	345.298		941	613.658	177.813
	942	387.531	325.721		942	1253.44	345.334		942	606.487	177.905
	943	388.273	325.959		943	1280.79	344.415		943	603.645	177.183
	944	387.364	325.964		944	1313.38	344.301		944	599.138	176.751
	945	383.515	327.934		945	1349.68	345.017		945	597.681	177.858
	946	379.532	327.3		946	1377.42	344.516		946	589.065	177.424
	947	385.595	328.139		947	1390.02	345.621		947	581.831	177.996
	948	387.103	385.702		948	1402.13	344.75		948	577.268	177.743
	949	387.637	468.806		949	1409.29	344.21		949	568.908	176.965
	950	388.401	543.218		950	1433.5	344.147		950	568.461	177.23
	951	387.166	611.62		951	1464.06	344.094		951	565.558	177.187
	952	385.084	674.7		952	1491	343.655		952	562.352	177.383
	953	384.567	730.66		953	1506.64	345.378		953	558.034	178.473
	954	384.468	782.722		954	1508.86	344.593		954	552.349	177.782
	955	385.686	829.962		955	1509.87	344.285		955	546.488	178.23
	956	386.684	875.774		956	1511.24	344.097		956	545.253	179
	957	386.603	921.745		957	1523.71	343.803		957	541.915	178.16
	958	385.007	964.586		958	1537.08	343.958		958	538.94	177.79
	959	383.023	997.812		959	1540.94	344.504		959	536.549	178.193
	960	382.175	1032.65		960	1526.82	344.803		960	530.655	179.346
	961	382.136	1060.93		961	1502.91	344.851		961	525.983	178.885
	962	383.688	1093.02		962	1475.5	343.795		962	523.095	178.887
	963	382.987	1128.46		963	1454.55	343.27		963	520.515	177.399
	964	383.81	1161.82		964	1447.1	344.247		964	520.456	177.833
	965	381.319	1193.02		965	1440.53	344.57		965	519.032	177.926
	966	380.328	1219.64		966	1425.7	344.391		966	515.007	178.36
	967	375.746	1240.2		967	1397.36	344.863		967	510.934	179.008
	968	378.389	1262.57		968	1364.2	344.197		968	507.447	177.383
	969	380.938	1291.11		969	1330.59	344.275		969	503.634	177.49
	970	382.512	1321.02		970	1309.52	344.438		970	503.828	176.35
	971	381.996	1346.35		971	1296.63	343.487		971	503.855	177.613
	972	378.399	1370.98		972	1285.13	344.431		972	502.241	177.772
	973	377.492	1389.17		973	1261.17	344.45		973	498.069	177.564
	974	372.087	1402.21		974	1229	344.233		974	494.667	178.251
	975	378.087	1416.7		975	1196.17	344.69		975	491.497	178.728
	976	378.402	1434.5		976	1166.39	343.169		976	489.935	178.547
	977	380.413	1456.73		977	1147.87	343.198		977	489.898	176.979
	978	377.453	1471.01		978	1135.65	344.168		978	489.202	177.609
	979	372.955	1477.23		979	1121.39	343.115		979	486.912	178.42
	980	380.732	1478.56		980	1099.64	344.104		980	485.11	176.416
	981	456.253	1474.99		981	1068.64	343.877		981	482.241	177.035
	982	539.334	1465.69		982	1040.94	343.269		982	478.747	177.786
	983	606.715	1461.07		983	1016.48	342.81		983	478.368	176.5
	984	651.729	1453.83		984	1004.9	343.316		984	477.909	177.018
	985	725.991	1442.99		985	994.31	342.946		985	478.338	178.368
	986	773.07	1417.97		986	981.576	343.695		986	477.575	177.496
	987	817.065	1397.39		987	960.675	344.09		987	472.575	177.656
	988	856.838	1372.01		988	935.654	343.109		988	471.411	176.389
	989	884.86	1348.44		989	911.877	343.106		989	468.422	176.792
	990	922.246	1329.75		990	894.9	342.069		990	468.179	178.86
	991	966.943	1306.79		991	886.474	342.198		991	469.309	177.73
	992	996.858	1285.91		992	879.002	342.542		992	468.609	178.753
	993	1018.73	1256.54		993	868.309	343.086		993	467.003	177.362
	994	1028.56	1228.94		994	849.339	342.717		994	463.965	177.728
	995	1067.18	1201.02		995	829.45	342.384		995	462.001	177.751
	996	1106.63	1177.13		996	812.384	341.031		996	459.909	176.708
	997	1133.66	1156.78		997	801.801	341.375		997	461.222	176.864
	998	1149.64	1134.67		998	795.42	340.487		998	462.831	177.632
	999	1141.94	1110.34		999	789.457	340.886		999	460.727	177.191
	1000	1183.95	1082.93		1000	780.091	341.321		1000	458.713	177.06
	1001	1200.61	1053.51		1001	762.996	341.487		1001	456.089	177.449
	1002	1223.99	1029.46		1002	747.504	341.762		1002	454.338	178.025
	1003	1242.98	1011.01		1003	733.779	340.11		1003	453.538	177.938
	1004	1223.22	989.237		1004	727.074	340.587		1004	453.518	177.008
	1005	1264.82	970.691		1005	723.793	340.47		1005	454.894	177.813
	1006	1259.66	949.302		1006	719.432	340.49		1006	453.197	178.788
	1007	1257.6	925.453		1007	709.825	340.712		1007	450.88	178.529
	1008	1253.09	902.306		1008	696.805	340.758		1008	449.559	177.65
	1009	1231.46	880.555		1009	682.932	339.69		1009	446.673	177.21
	1010	1222.34	864.833		1010	673.715	338.513		1010	447.595	179.119
	1011	1229.3	850.246		1011	670.573	339.344		1011	449.509	176.516
	1012	1213.49	833.612		1012	667.288	339.074		1012	449.718	178.274
	1013	1186.34	814.647		1013	663.739	339.163		1013	448.279	177.907
	1014	1146.75	797.248		1014	654.705	339.706		1014	447.201	177.988
	1015	1144.92	777.986		1015	642.269	339.567		1015	444.121	177.146
	1016	1135.85	763.327		1016	631.743	339.227		1016	443.249	177.377
	1017	1118.78	751.341		1017	625.808	338.579		1017	443.654	177.095
	1018	1095.12	738.897		1018	625.571	338.625		1018	444.269	176.558
	1019	1055.36	725.016		1019	624.878	339.312		1019	445.835	177.5
	1020	1021.02	711.142		1020	619.97	339.246		1020	442.503	178.119
	1021	1016.2	697.297		1021	610.339	339.027		1021	440.76	177.488
	1022	995.036	682.938		1022	601.45	337.927		1022	439.799	176.979
	1023	977.617	671.485		1023	591.823	337.866		1023	439.041	177.49
	1024	942.051	662.009		1024	588.701	338.063		1024	439.437	177.35
	1025	919.928	653.273		1025	588.574	337.497		1025	441.413	178.331
	1026	910.845	642.506		1026	588.722	337.925		1026	440.825	178.095
	1027	889.9	631.281		1027	585.512	337.503		1027	439.972	178.027
	1028	869.055	619.652		1028	575.772	337.692		1028	436.901	177.809
	1029	851.196	609.923		1029	567.96	337.169		1029	436.398	177.202
	1030	812.988	602.473		1030	561.599	337.062		1030	435.328	177.584
	1031	820.42	595.92		1031	560.093	336.283		1031	437.949	178.687
	1032	800.391	587.749		1032	562.028	337.131		1032	437.735	178.2
	1033	781.547	579.023		1033	560.57	336.534		1033	437.387	177.333
	1034	763.839	568.735		1034	555.163	337.224		1034	435.258	177.747
	1035	737.216	562.126		1035	548.48	336.66		1035	434.229	178.088
	1036	729.821	554.069		1036	540.632	336.843		1036	432.429	177.385
	1037	728.148	549.958		1037	537.375	335.705		1037	433.531	177.025
	1038	716.646	543.794		1038	538.108	335.53		1038	433.831	177.589
	1039	700.999	537.467		1039	538.918	335.386		1039	434.012	178.319
	1040	684.326	529.97		1040	538.519	336.309		1040	433.404	178.358
	1041	663.652	523.716		1041	532.69	335.761		1041	432.484	177.473
	1042	659.792	516.418		1042	525.873	336.06		1042	430.029	175.988
	1043	656.83	511.282		1043	520.184	335.457		1043	429.948	176.539
	1044	648.918	507.048		1044	518.895	335.457		1044	431.2	176.827
	1045	631.373	503.527		1045	520.115	335.014		1045	432.065	177.613
	1046	616.968	498.305		1046	521.623	335.859		1046	433.768	177.249
	1047	614.872	493.073		1047	520.069	335.736		1047	430.993	177.856
	1048	607.606	486.507		1048	514.541	336.16		1048	430.06	177.99
	1049	600.82	481.241		1049	509.651	335.657		1049	428.992	177.375
	1050	594.453	477.414		1050	505.604	334.96		1050	429.244	177.603
	1051	572.199	475.072		1051	504.577	335.12		1051	430.873	176.903
	1052	580.007	471.279		1052	506.875	335.791		1052	431.484	176.722
	1053	570.25	467.514		1053	506.905	334.729		1053	430.973	178.671
	1054	562.055	462.441		1054	505.778	335.758		1054	429.815	177.43
	1055	548.868	457.147		1055	501.035	334.617		1055	428.569	178.321
	1056	547.846	453.474		1056	495.179	334.803		1056	426.933	176.477
	1057	547.408	450.561		1057	492.285	334.991		1057	429.928	176.924
	1058	542.923	448.601		1058	493.256	334.373		1058	430.166	177.733
	1059	530.274	446.229		1059	494.633	334.864		1059	431.069	178.171
	1060	519.528	441.701		1060	495.607	334.127		1060	430.433	177.062
	1061	521.469	437.855		1061	492.467	335.417		1061	428.086	177.887
	1062	510.368	434.553		1062	487.381	334.858		1062	426.147	177.8
	1063	509.007	431.696		1063	483.311	334.32		1063	426.285	177.475
	1064	506.973	429.841		1064	480.879	334.484		1064	426.96	177.588
	1065	508.55	427.742		1065	483.136	334.195		1065	428.894	177.796
	1066	500.773	425.505		1066	485.675	335.11		1066	428.527	178.031
	1067	493.4	422.143		1067	485.379	334.856		1067	428.901	178.158
	1068	483.344	418.724		1068	482.242	334.735		1068	427.664	177.899
	1069	487.849	414.911		1069	476.715	334.887		1069	428.109	177.644
	1070	487.061	412.781		1070	472.809	335.289		1070	459.573	177.179
	1071	483.927	412.363		1071	472.407	334.056		1071	576.087	176.504
	1072	473.858	411.003		1072	474.521	334.622		1072	687.067	176.79
	1073	467.759	408.571		1073	476.277	335.118		1073	791.665	177.512
	1074	470.587	405.87		1074	476.15	335.18		1074	889.419	177.428
	1075	466.299	402.383		1075	472.073	334.89		1075	976.555	176.819
	1076	465.402	399.865		1076	467.801	334.541		1076	1060.05	176.852
	1077	454.237	399.057		1077	465.176	334.252		1077	1137.18	176.422
	1078	450.375	397.733		1078	465.77	334.628		1078	1213.16	177.64
	1079	458.478	397.129		1079	468.013	334.136		1079	1285.33	177.938
	1080	448.416	394.288		1080	469.676	333.574		1080	1342.31	177.693
	1081	451.767	392.322		1081	468.01	335.148		1081	1392.74	178.033
	1082	450.04	388.833		1082	463.647	334.429		1082	1441.6	178.726
	1083	442.757	386.651		1083	459.977	334.113		1083	1482.75	176.778
	1084	441.565	386.095		1084	457.271	333.671		1084	1534.08	176.903
	1085	444.882	385.458		1085	459.656	333.35		1085	1583.29	176.049
	1086	441.909	383.494		1086	462.677	334.18		1086	1627.74	178.374
	1087	435.729	381.83		1087	463.839	333.866		1087	1663.01	178.076
	1088	429.004	378.654		1088	461.57	334.265		1088	1692.29	177.389
	1089	431.627	377.244		1089	456.965	334.154		1089	1718.83	177.224
	1090	434.546	375.301		1090	453.488	333.96		1090	1751.63	176.944
	1091	435.73	375.378		1091	453.421	333.431		1091	1787.67	176.979
	1092	430.316	374.683		1092	455.721	333.339		1092	1824.14	177.981
	1093	421.163	373.664		1093	457.732	333.29		1093	1860.18	177.529
	1094	420.996	371.796		1094	458.013	334.402		1094	1874.5	177.815
	1095	425.704	369.973		1095	455.007	335.168		1095	1887.4	177.181
	1096	418.917	368.083		1096	451.571	335.178		1096	1903.63	176.87
	1097	420.542	366.921		1097	448.243	334.468		1097	1919.41	177.197
	1098	424.276	367.569		1098	448.974	333.727		1098	1947.78	177.286
	1099	421.852	366.899		1099	451.283	334.335		1099	1966.75	177.73
	1100	418.196	364.542		1100	453.714	333.825		1100	1977.37	176.955
	1101	411.242	363.13		1101	453.37	335.284		1101	1971.08	177.498
	1102	413.3	361.436		1102	449.887	335.441		1102	1954.31	176.749
	1103	414.655	360.337		1103	446.832	334.429		1103	1933.79	176.996
	1104	414.803	360.105		1104	444.593	334.214		1104	1918.49	177.07
	1105	405.819	359.408		1105	446.832	334.334		1105	1901.56	178.307
	1106	403.774	359.084		1106	448.944	335.158		1106	1885.89	177.654
	1107	409.516	358.171		1107	451.193	335.497		1107	1858.72	177.148
	1108	404.07	355.705		1108	449.608	335.498		1108	1818.1	176.798
	1109	406.484	354.433		1109	445.512	339.812		1109	1781.23	177.021
	1110	408.315	353.502		1110	441.917	385.528		1110	1741.74	176.346
	1111	402.851	353.523		1111	440.863	435.482		1111	1714.4	176.383
	1112	399.795	353.159		1112	443.369	483.089		1112	1688.59	176.327
	1113	402.842	353.406		1113	445.685	526.751		1113	1656.28	177.239
	1114	395.31	351.729		1114	448.118	571.943		1114	1616.59	177.724
	1115	398.25	349.85		1115	445.189	611.848		1115	1574.54	177.082
	1116	398.147	348.703		1116	442.039	651.512		1116	1528.83	177.518
	1117	400.498	348.988		1117	439.324	686.892		1117	1496.57	176.807
	1118	399.814	348.56		1118	439.211	720.901		1118	1465.97	177.265
	1119	390.183	347.781		1119	442.21	751.606		1119	1436.87	177.072
	1120	389.203	347.435		1120	443.806	782.331		1120	1407.14	178.086
	1121	394.198	346.38		1121	444.49	807.734		1121	1365.73	177.449
	1122	388.726	344.813		1122	441.001	835.392		1122	1328.15	177.484
	1123	386.434	343.907		1123	437.337	860.452		1123	1289.6	175.877
	1124	394.969	344.184		1124	435.289	881.949		1124	1258.86	176.535
	1125	394.271	344.233		1125	436.953	903.703		1125	1236.54	177.3
	1126	392.643	343.745		1126	439.159	925.263		1126	1212.3	177.233
	1127	388.437	343.143		1127	441.939	943.338		1127	1182.38	178.058
	1128	383.09	341.494		1128	440.845	964.972		1128	1147.61	177
	1129	389.363	340.218		1129	438.161	979.951		1129	1120.52	176.946
	1130	390.302	339.771		1130	434.853	997.469		1130	1091.7	177
	1131	390.866	339.76		1131	432.781	1009.83		1131	1071.32	177.518
	1132	381.89	339.915		1132	434.371	1021.69		1132	1051.6	176.358
	1133	379.877	339.53		1133	438.181	1035.81		1133	1031.92	177.123
	1134	380.784	339.169		1134	440.08	1048.03		1134	1008.78	177.006
	1135	385.498	336.98		1135	439.151	1053.76		1135	983	177.309
	1136	383.705	337.114		1136	434.511	1058.48		1136	958.419	176.041
	1137	386.233	336.198		1137	433.046	1058.82		1137	938.138	176.362
	1138	386.814	336.752		1138	431.951	1053.99		1138	921.643	176.732
	1139	381.983	336.744		1139	434.126	1045.43		1139	908.874	176.615
	1140	379.161	336.702		1140	437.75	1034.83		1140	893.39	178.307
	1141	381.909	336.012		1141	438.631	1021.85		1141	874.34	177.821
	1142	381.185	334.812		1142	435.987	1009.95		1142	854.371	178.064
	1143	378.825	333.211		1143	433.742	990.951		1143	837.095	176.724
	1144	374.973	333.577		1144	431.064	970.215		1144	823.234	177.562
	1145	375.997	334.409		1145	431.384	952.016		1145	813.921	177.582
	1146	381.56	334.828		1146	434.367	930.688		1146	800.401	177.735
	1147	379.281	334.126		1147	436.937	911.018		1147	789.073	177.813
	1148	378.465	333.219		1148	437.705	891.266		1148	774.76	178.103
	1149	373.507	332.08		1149	434.909	872.053		1149	758.798	177.761
	1150	379.944	331.787		1150	431.798	853.016		1150	745.428	176.025
	1151	380.476	331.923		1151	429.932	830.465		1151	734.169	177.44
	1152	377.057	333.112		1152	431.615	811.302		1152	728.472	177.743
	1153	374.291	332.666		1153	433.518	793.347		1153	721.36	177.259
	1154	378.581	332.234		1154	436.356	775.606		1154	710.387	177.512
	1155	377.658	330.963		1155	436.239	760.166		1155	698.712	177.901
	1156	377.584	330.183		1156	433.575	742.398		1156	687.86	179.082
	1157	371.917	329.835		1157	430.323	726.313		1157	675.631	177.198
	1158	371.186	330.056		1158	429.976	710.083		1158	669.585	177.757
	1159	379.286	330.76		1159	432.228	695.305		1159	664.553	177.405
	1160	377.653	330.474		1160	435.691	682.236		1160	657.565	177.136
	1161	375.722	329.781		1161	437.294	668.421		1161	648.785	177.737
	1162	374.06	328.272		1162	435.892	657.586		1162	640.148	177.842
	1163	370.57	328.586		1163	432.86	645.686		1163	629.65	177.002
	1164	369.281	328.471		1164	438.807	633.898		1164	623.849	176.835
	1165	377.755	329.408		1165	524.813	620.507		1165	618.637	177.066
	1166	375.981	329.708		1166	611.314	609.953		1166	616.037	177.195
	1167	376.83	328.833		1167	690.735	600.661		1167	612.246	177.247
	1168	374.494	327.59		1168	764.233	592.55		1168	603.646	177.043
	1169	368.523	327.771		1169	823.747	584.345		1169	596.426	177.025
	1170	374.364	326.344		1170	875.39	576.211		1170	589.446	176.911
	1171	376.608	326.347		1171	922.114	565.847		1171	584.054	176.726
	1172	377.029	327.619		1172	970.537	558.977		1172	581.735	177.29
	1173	370.636	328.364		1173	1023	551.385		1173	578.578	178.35
	1174	367.362	326.918		1174	1070.8	544.379		1174	575.36	177.432
	1175	367.479	325.854		1175	1108.26	539.962		1175	569.675	177.494
	1176	373.47	325.106		1176	1131.5	532.513		1176	561.614	176.354
	1177	372.642	325.368		1177	1154.57	526.021		1177	556.674	178.008
	1178	371.57	325.506		1178	1178.64	520.29		1178	553.981	176.496
	1179	366.538	326.007		1179	1212.86	512.867		1179	552.27	177.195
	1180	368.761	326.484		1180	1251.09	508.739		1180	552.043	177.924
	1181	373.317	325.992		1181	1285.29	504.246		1181	548.1	178.905
	1182	372.899	325.3		1182	1306.2	498.845		1182	543.15	177.825
	1183	372.608	324.09		1183	1317.81	494.76		1183	537.543	178.173
	1184	368.794	323.259		1184	1328.61	489.7		1184	534.334	177.323
	1185	369.265	324.223		1185	1345.66	483.46		1185	531.846	176.255
	1186	373.995	324.984		1186	1379.5	480.067		1186	531.678	178.737
	1187	372.756	325.483		1187	1408.04	475.316		1187	528.159	178.399
	1188	366.185	325.395		1188	1435.18	472.352		1188	524.981	177.671
	1189	366.253	324.504		1189	1443.36	469.721		1189	520.773	175.741
	1190	369.447	323.925		1190	1447.67	464.9		1190	516.403	177.099
	1191	371.302	323.823		1191	1453.86	460.62		1191	514.305	177.224
	1192	373.293	324.398		1192	1469.16	458.747		1192	514.961	176.399
	1193	372.346	325.42		1193	1493.43	454.615		1193	513.027	177.698
	1194	366.064	325.069		1194	1514.39	451.703		1194	512.402	176.967
	1195	370.313	324.587		1195	1523.49	448.923		1195	508.027	177.792
	1196	371.457	322.9		1196	1510.39	445.566		1196	503.694	178.446
	1197	367.969	323.221		1197	1492.83	443.466		1197	500.727	177.759
	1198	366.166	323.523		1198	1476.96	438.953		1198	497.671	176.339
	1199	368.952	323.981		1199	1470.54	436.68		1199	500.457	176.241
	1200	373.22	324.393		1200	1468.62	434.208		1200	499.325	177.49
	1201	371.19	325.199		1201	1462.76	431.732		1201	496.37	177.825
	1202	366.376	324.102		1202	1443.58	429.858		1202	494.483	178.735
	1203	366.32	323.209		1203	1412.71	427.343		1203	491.656	177.117
	1204	369.78	323.334		1204	1379.26	424.686		1204	488.117	177.837
	1205	372.726	323.622		1205	1353.24	422.771		1205	487.308	176.253
	1206	374.099	325.17		1206	1337.28	420.53		1206	489.621	176.953
	1207	366.28	326.619		1207	1328.21	417.454		1207	487.466	176.239
	1208	369.044	330.167		1208	1311.97	415.824		1208	486.374	177.014
	1209	446.429	397.818		1209	1283.57	414.087		1209	483.091	177.226
	1210	521.551	476.125		1210	1246.56	412.457		1210	479.298	176.947
	1211	581.211	547.054		1211	1215.75	409.633		1211	477.33	176.119
	1212	639.831	615.726		1212	1191.22	407.411		1212	477.172	177.712
	1213	712.172	680.007		1213	1177.04	405.485		1213	477.71	176.763
	1214	757.929	740.164		1214	1163.62	404.241		1214	477.804	177.352
	1215	801.896	791.506		1215	1146.36	403.133		1215	475.595	175.786
	1216	825.885	837.545		1216	1116.23	402.4		1216	472.262	176.556
	1217	860.992	883.299		1217	1085.07	399.588		1217	468.485	177.677
	1218	893.634	925.243		1218	1057.98	398.146		1218	470.074	176.665
	1219	926.082	967.592		1219	1038.78	396.962		1219	470.202	176.798
	1220	965.691	1005.96		1220	1025.85	395.206		1220	469.483	176.535
	1221	1002.01	1044.29		1221	1012.86	393.607		1221	468.731	178.613
	1222	1009.9	1075.92		1222	993.953	393.833		1222	467.084	177.239
	1223	1035.84	1103.3		1223	969.13	390.993		1223	463.554	176.821
	1224	1057.69	1134		1224	941.69	390.098		1224	461.16	177.183
	1225	1111.7	1167.9		1225	921.14	388.168		1225	461.134	177.099
	1226	1140.38	1199.85		1226	907.549	386.779		1226	460.877	176.045
	1227	1138.54	1231.67		1227	899.005	386.041		1227	461.679	176.858
	1228	1145.82	1260.31		1228	889.566	385.362		1228	462.309	177.605
	1229	1163.91	1282.31		1229	871.924	383.83		1229	457.895	177.405
	1230	1207.01	1304.3		1230	851.531	383.451		1230	456.027	176.759
	1231	1192.42	1329.48		1231	832.851	381.965		1231	454.885	177.307
	1232	1203.54	1356.81		1232	816.231	380.928		1232	455.565	177.442
	1233	1215.35	1382.78		1233	807.535	378.73		1233	456.24	177.877
	1234	1252	1407.38		1234	801.342	378.561		1234	456.604	178.22
	1235	1222.54	1424.76		1235	792.985	376.751		1235	454.695	177.123
	1236	1214.81	1440.64		1236	777.027	376.499		1236	452.809	177.615
	1237	1205.65	1454.1		1237	760.046	375.65		1237	450.4	177.103
	1238	1231.45	1468.01		1238	743.454	375.015		1238	448.537	176.442
	1239	1180.73	1483.41		1239	733.523	373.042		1239	450.558	177.988
	1240	1167.47	1494.82		1240	729.906	372.133		1240	451.21	178.025
	1241	1154.21	1498.39		1241	725.089	370.094		1241	451.628	177.169
	1242	1159.15	1489.57		1242	717.531	371.178		1242	449.007	177.527
	1243	1120.28	1479.81		1243	703.708	370.732		1243	448.653	176.909
	1244	1096.6	1465.14		1244	689.305	369.651		1244	445.847	177.626
	1245	1076.05	1451.6		1245	676.617	369.017		1245	445.432	176.829
	1246	1065.71	1440.55		1246	670.948	368.382		1246	446.522	176.786
	1247	1063.93	1429.37		1247	668.692	367.215		1247	446.775	177.973
	1248	1035.49	1408.44		1248	664.563	366.629		1248	447.457	177.06
	1249	992.64	1383.63		1249	658.452	367.053		1249	444.057	176.319
	1250	969.374	1359.27		1250	646.368	365.72		1250	441.363	177.014
	1251	959.912	1334.46		1251	635.132	365.933		1251	440.23	176.414
	1252	952.419	1313.7		1252	625.812	363.943		1252	440.04	176.35
	1253	922.425	1294.81		1253	622.284	362.939		1253	441.161	177.508
	1254	883.604	1272.26		1254	621.673	363.318		1254	442.202	177.815
	1255	866.534	1246.27		1255	619.041	362.439		1255	441.396	177.928
	1256	847	1217.25		1256	611.993	363.412		1256	439.277	177.389
	1257	829.3	1188.98		1257	600.831	362.467		1257	437.427	175.741
	1258	820.696	1164.37		1258	591.912	361.89		1258	436.602	175.663
	1259	802.617	1144.06		1259	586.344	361.308		1259	437.601	176.93
	1260	774.216	1122.79		1260	585.426	360.458		1260	439.46	176.43
	1261	758.543	1098.73		1261	584.878	359.912		1261	439.777	177.356
	1262	744.253	1074.43		1262	582.687	360.085		1262	438.175	177.687
	1263	729.838	1048.66		1263	574.471	359.973		1263	435.435	177.253
	1264	731.64	1022.55		1264	565.289	359.552		1264	433.538	176.698
	1265	713.56	999.741		1265	558.229	358.682		1265	434.174	177.35
	1266	698.604	981.462		1266	554.512	358.462		1266	435.485	176.8
	1267	675.622	962.708		1267	554.951	357.608		1267	436.39	176.745
	1268	664.78	942.235		1268	555.384	357.148		1268	437.081	176.796
	1269	655.238	920.011		1269	552.3	357.3		1269	435.644	177.076
	1270	643.35	896.754		1270	546.357	357.128		1270	432.655	176.57
	1271	646.52	876.293		1271	538.58	356.919		1271	432.754	177.819
	1272	637.456	859.284		1272	533.313	355.775		1272	432.177	176.36
	1273	621.274	844.289		1273	532.644	356.278		1273	433.589	177.144
	1274	602.614	828.993		1274	532.429	355.33		1274	435.005	176.615
	1275	597.311	811.097		1275	532.506	355.773		1275	434.601	177.636
	1276	597.31	792.157		1276	528.671	357.67		1276	433.32	177.519
	1277	576.906	775.046		1277	522.598	356.586		1277	431.201	177.387
	1278	569.096	760.189		1278	516.328	356.775		1278	430.317	177.197
	1279	562.123	747.33		1279	512.787	355.276		1279	432.01	176.879
	1280	570.613	734.131		1280	513.566	353.953		1280	432.916	176.224
	1281	554.339	721.579		1281	514.077	354.522		1281	433.631	176.936
	1282	551.492	707.867		1282	514.842	355.088		1282	432.841	177.409
	1283	535.698	691.896		1283	510.753	355.101		1283	430.671	177.399
	1284	529.186	677.984		1284	504.02	354.464		1284	429.779	176.977
	1285	522.21	666.106		1285	498.157	353.617		1285	428.977	177.163
	1286	516.478	657.009		1286	495.976	353.472		1286	430.253	177.136
	1287	526.274	648.378		1287	498.017	354.091		1287	432.024	176.944
	1288	506.335	637.343		1288	499.357	352.624		1288	434.266	176.665
	1289	502.609	626.955		1289	498.957	352.746		1289	430.726	177.784
	1290	497.643	615.965		1290	493.932	353.318		1290	429.878	177.245
	1291	491.882	603.939		1291	489.07	352.799		1291	427.366	177.971
	1292	499.697	595.988		1292	484.04	351.807		1292	429.857	176.741
	1293	482.541	589.694		1293	483.732	350.676		1293	429.84	176.724
	1294	478.178	581.59		1294	485.55	351.032		1294	432.021	177.531
	1295	474.735	573.312		1295	487.444	351.653		1295	431.507	178.076
	1296	471.853	564.55		1296	487.008	351.474		1296	431.784	177.457
	1297	472.548	554.001		1297	482.345	351.378		1297	435.127	177.123
	1298	467.42	545.596		1298	477.09	351.058		1298	519.527	176.881
	1299	459.973	542.371		1299	474.735	350.168		1299	632.42	177.13
	1300	456.614	535.401		1300	474.65	350.343		1300	737.568	176.891
	1301	454.553	531.365		1301	477.194	349.641		1301	846.318	178.091
	1302	451.597	523.158		1302	479.156	348.946		1302	945.106	176.22
	1303	455.253	516.247		1303	477.171	350.543		1303	1034.49	176.113
	1304	445.652	510.727		1304	471.655	350.487		1304	1176.41	176.165
	1305	441.52	502.649		1305	468.314	349.537		1305	1368.12	178.235
	1306	444.511	499.38		1306	465.136	347.793		1306	1444.37	177.093
	1307	443.439	496.02		1307	467.623	349.109		1307	1512.8	177.391
	1308	434.114	489.928		1308	469.902	348.487		1308	1580.8	177.313
	1309	433.015	484.257		1309	470.465	349.039		1309	1645.57	176.85
	1310	430.865	479.338		1310	467.332	349.121		1310	1708.28	176.99
	1311	428.021	473.4		1311	462.799	348.369		1311	1769.03	176.142
	1312	434.363	469.035		1312	459.648	347.916		1312	1824.18	176.107
	1313	435.059	465.526		1313	459.408	348.41		1313	1865.23	177.444
	1314	423.931	462.576		1314	461.138	348.039		1314	1903.28	177.477
	1315	419.855	458.849		1315	463.295	347.765		1315	1944.72	178.107
	1316	418.858	453.184		1316	463.305	347.45		1316	1989.14	178.568
	1317	417.262	450.016		1317	460.263	347.571		1317	2039.73	177.58
	1318	420.233	444.884		1318	456.286	347.994		1318	2082	177.521
	1319	417.813	442.473		1319	452.932	346.966		1319	2111.77	177.257
	1320	411.593	439.6		1320	454.128	347.518		1320	2141.07	176.891
	1321	410.21	437.348		1321	456.539	347.044		1321	2162.32	178.198
	1322	409.045	434.386		1322	457.898	346.383		1322	2191.28	177.109
	1323	411.837	430.373		1323	457.16	346.945		1323	2230.63	177.158
	1324	412.404	426.982		1324	453.543	346.873		1324	2261.22	178.058
	1325	412.482	422.465		1325	450.129	347.656		1325	2287.87	177.282
	1326	402.807	421.48		1326	447.302	346.775		1326	2292.89	176.611
	1327	401.88	419.678		1327	448.792	346.447		1327	2293.43	176.547
	1328	400.987	417.218		1328	451.298	346.852		1328	2289.08	177.638
	1329	406.554	413.46		1329	453.033	346.48		1329	2281.51	177.025
	1330	398.712	409.754		1330	451.487	346.354		1330	2282.53	178.294
	1331	397.275	406.787		1331	449.09	345.977		1331	2268.59	176.482
	1332	399.47	404.383		1332	445.362	345.974		1332	2246.85	177.827
	1333	405.313	403.11		1333	443.655	345.412		1333	2208.15	176.698
	1334	403.21	402.014		1334	445.682	345.159		1334	2167.88	177.938
	1335	393.425	399.86		1335	448.26	344.789		1335	2126.52	177.144
	1336	398.546	396.99		1336	449.511	345.093		1336	2098.14	177.922
	1337	397.681	393.914		1337	446.861	345.617		1337	2070.47	176.755
	1338	393.433	391.108		1338	442.977	344.846		1338	2033.84	177.305
	1339	389.457	389.828		1339	440.38	344.653		1339	1996.36	176.407
	1340	393.358	389.121		1340	440.17	344.646		1340	1943.19	176.741
	1341	395.114	388.177		1341	443.073	344.18		1341	1898.16	176.842
	1342	387.49	386.264		1342	445.021	343.851		1342	1852.59	177.897
	1343	387.136	384.644		1343	445.426	344.456		1343	1821.3	177.558
	1344	390.796	381.305		1344	442.337	344.051		1344	1783.65	177.175
	1345	387.169	379.741		1345	439.195	344.527		1345	1749.41	177.002
	1346	384.567	378.391		1346	437.229	344.074		1346	1699.8	177.626
	1347	384.044	377.451		1347	438.458	343.429		1347	1655.68	176.566
	1348	386.651	377.013		1348	441.193	344.613		1348	1610.15	177.938
	1349	388.813	374.627		1349	442.456	343.48		1349	1569.06	177.648
	1350	382.057	372.793		1350	443.048	344.534		1350	1542.17	176.615
	1351	380.924	371.337		1351	439.207	344.518		1351	1511.49	177.411
	1352	384.063	369.202		1352	436.098	344.633		1352	1475.08	177.626
	1353	388.074	369.038		1353	434.583	343.673		1353	1435.96	176.821
	1354	388.561	368.63		1354	437.36	342.862		1354	1396.65	177.685
	1355	377.912	367.45		1355	438.873	342.776		1355	1360.79	177.377
	1356	378.827	365.773		1356	440.88	343.399		1356	1329.03	177.3
	1357	383.081	363.798		1357	439.345	344.523		1357	1306.97	178.665
	1358	380.105	361.645		1358	436.667	343.425		1358	1282.27	177.298
	1359	376.69	361.434		1359	433.819	343.478		1359	1251.94	177.749
	1360	380.405	360.986		1360	432.53	343.431		1360	1221.31	176.912
	1361	384.572	360.433		1361	435.399	343.052		1361	1192.35	177.232
	1362	383.779	359.289		1362	438.187	342.833		1362	1159.95	177.798
	1363	378.771	358.867		1363	439.865	344.336		1363	1139.73	176.617
	1364	375.272	356.955		1364	436.812	343.881		1364	1121.45	176.977
	1365	374.921	355.141		1365	433.856	351.554		1365	1100.61	176.449
	1366	383.209	354.589		1366	431.876	397.049		1366	1075.37	176.321
	1367	373.673	354.731		1367	431.963	441.943		1367	1051.5	177.996
	1368	372.899	354.501		1368	435.335	483.273		1368	1028.25	178.535
	1369	374.167	352.966		1369	437.673	523.265		1369	1007.16	176.811
	1370	379.505	350.773		1370	438.394	560.453		1370	992.762	177.803
	1371	372.545	349.967		1371	435.642	597.559		1371	981.07	177.506
	1372	371.327	349.03		1372	432.214	630.504		1372	963.207	177.241
	1373	375.982	348.929		1373	430.914	660.395		1373	943.066	176.463
	1374	380.476	348.955		1374	432.315	689.248		1374	922.555	175.364
	1375	370.874	349.106		1375	434.684	716.27		1375	903.543	176.457
	1376	377.704	347.611		1376	437.575	742.256		1376	891.819	177.195
	1377	374.263	345.941		1377	436.81	768.148		1377	880.299	177.356
	1378	370.788	344.67		1378	434.467	792.945		1378	868.986	177.562
	1379	370.357	344.73		1379	431.068	812.101		1379	854.602	177.078
	1380	378.352	344.013		1380	430.319	832.575		1380	840.547	177.138
	1381	378.831	344.706		1381	432.639	851.372		1381	824.93	176.21
	1382	374.495	344.811		1382	435.429	868.734		1382	810.395	176.809
	1383	370.094	343.844		1383	436.136	887.865		1383	799.838	175.899
	1384	375.04	341.946		1384	434.212	906.223		1384	793.84	176.243
	1385	369.763	341.303		1385	431.652	921.604		1385	786.034	176.642
	1386	372.199	341.137		1386	428.607	932.136		1386	774.115	176.531
	1387	376.317	340.645		1387	428.51	945.434		1387	761.319	176.982
	1388	376.268	340.943		1388	430.756	957.703		1388	748.862	176.568
	1389	374.003	341.754		1389	432.936	967.841		1389	738.068	175.885
	1390	367.321	340.957		1390	434.095	978.828		1390	730.154	177.103
	1391	372.636	339.307		1391	432.437	990.701		1391	725.109	177.842
	1392	373.864	338.052		1392	429.346	995.522		1392	718.801	176.685
	1393	375.113	338.014		1393	425.914	996.706		1393	708.206	176.965
	1394	370.591	338.77		1394	427.544	997.114		1394	699.981	176.827
	1395	369.332	339.353		1395	431.158	994.412		1395	689.635	177.887
	1396	373.496	337.709		1396	433.02	991.355		1396	681.739	175.802
	1397	371.7	336.916		1397	434.031	983.863		1397	678.589	175.969
	1398	371.933	335.358		1398	429.99	973.18		1398	673.71	177.012
	1399	368.525	334.159		1399	427.654	960.787		1399	669.407	175.971
	1400	369.624	333.699		1400	430.228	940.16		1400	660.581	175.286
	1401	373.2	335.281		1401	505.442	921.988		1401	652.171	177.078
	1402	364.441	334.987		1402	594.438	902.941		1402	644.984	176.331
	1403	371.891	333.931		1403	672.913	883.617		1403	640.931	176.543
	1404	366.681	333.38		1404	740.69	867.224		1404	637.077	177.346
	1405	364.739	332.141		1405	799.823	847.714		1405	633.565	177.288
	1406	372.468	331.091		1406	853.548	827.721		1406	631.212	177.074
	1407	373.025	331.84		1407	904.659	806.141		1407	622.753	176.64
	1408	373.756	332.397		1408	959.594	786.543		1408	616.376	177.607
	1409	372.26	331.691		1409	1010.88	767.323		1409	610.281	176.802
	1410	370.812	331.262		1410	1056.58	750.956		1410	607.435	176.119
	1411	369.902	329.518		1411	1087.92	733.795		1411	606.41	178.123
	1412	369.689	328.646		1412	1114.03	715.348		1412	601.634	177.212
	1413	362.823	329.026		1413	1138.24	698.686		1413	598.772	176.658
	1414	371.779	329.454		1414	1168.6	683.495		1414	591.406	176.494
	1415	371.184	330.556		1415	1208.61	667.561		1415	586.903	176.27
	1416	370.357	329.017		1416	1245.94	653.321		1416	582.247	176.58
	1417	369.684	328.645		1417	1275.72	640.147		1417	580.876	178.63
	1418	370.307	327.824		1418	1289.45	629.242		1418	581.599	177.714
	1419	370.087	326.628		1419	1300.76	616.819		1419	577.971	176.385
	1420	366.594	327.156		1420	1315.89	606.15		1420	573.739	176.72
	1421	366.698	328.151		1421	1343.96	594.155		1421	568.431	177.42
	1422	371.252	328.688		1422	1376.29	583.287		1422	564.519	178.249
	1423	369.807	328.124		1423	1405.72	574.586		1423	561.913	177.912
	1424	369.369	326.711		1424	1423.11	567.381		1424	561.947	176.512
	1425	369.73	326.059		1425	1429.01	557.546		1425	561.153	176.646
	1426	370.443	325.813		1426	1434.59	550.027		1426	560.103	177.154
	1427	370.684	326.216		1427	1442.37	540.943		1427	554.386	176.741
	1428	361.942	326.588		1428	1469.08	532.847		1428	550.271	177.041
	1429	370.144	326.752		1429	1493.13	524.793		1429	546.37	176.346
	1430	368.342	326.283		1430	1513.22	519.722		1430	544.697	177.78
	1431	369.22	324.625		1431	1509.57	513.167		1431	546.495	177.019
	1432	369.003	323.939		1432	1495.32	509.15		1432	544.889	176.982
	1433	370.012	324.046		1433	1479.16	501.731		1433	543.835	177.179
	1434	361.979	325.883		1434	1470.4	495.558		1434	540.202	177.037
	1435	371.142	325.25		1435	1471.6	489.685		1435	536.512	178.399
	1436	424.262	325.321		1436	1469.82	484.829		1436	534.242	177.018
	1437	507.154	325.46		1437	1459.04	479.831		1437	533.643	177.794
	1438	575.35	324.031		1438	1431.48	477.245		1438	532.306	176.965
	1439	636.516	323.996		1439	1401.72	472.456		1439	533.417	177.805
	1440	685.069	324.074		1440	1373.35	467.494		1440	529.151	176.755
	1441	734.605	324.404		1441	1354.31	461.711		1441	527.26	176.502
	1442	790.439	324.829		1442	1345.13	458.801		1442	523.734	177.403
	1443	830.438	325.192		1443	1332.23	456.22		1443	521.71	177.477
	1444	865.206	324.349		1444	1309.65	452.778		1444	522.742	177.856
	1445	898.228	322.871		1445	1278.04	448.384		1445	524.042	177.675
	1446	909.714	323.059		1446	1243.27	446.098		1446	523.243	176.846
	1447	967.209	323.576		1447	1213.12	441.85		1447	520.794	177.315
	1448	995.156	324.108		1448	1197.94	438.569		1448	517.782	177.578
	1449	1019.16	324.371		1449	1186.92	435.643		1449	515.559	177.984
	1450	1040.59	324.339		1450	1171.54	433.3		1450	515.043	175.99
	1451	1060.55	323.728		1451	1145.81	431.059		1451	516.703	176.418
	1452	1062.81	322.242		1452	1114.35	429.258		1452	515.504	177.163
	1453	1116.46	321.923		1453	1085.27	425.688		1453	515.671	176.42
	1454	1140.75	323.038		1454	1061.05	422.901		1454	511.538	176.329
	1455	1161.06	323.702		1455	1048.56	420.418		1455	508.109	177.916
	1456	1175.12	324.032		1456	1037.51	418.578		1456	506.263	178.482
	1457	1167.53	323		1457	1023.33	416.277		1457	506.824	177.619
	1458	1198.22	322.441		1458	998.355	414.998		1458	508.31	177.578
	1459	1194.28	321.732		1459	970.769	413.472		1459	508.852	177.342
	1460	1195.75	322.432		1460	947.407	410.257		1460	506.805	177.161
	1461	1218.65	323.132		1461	930.834	406.561		1461	504.397	178.056
	1462	1240.12	323.38		1462	922.832	405.35		1462	502.298	178.447
	1463	1228.74	322.501		1463	913.341	402.96		1463	500.575	178.778
	1464	1194.53	321.567		1464	901.63	402.304		1464	501.203	178.401
	1465	1203.29	322.188		1465	878.648	401.968		1465	501.823	178.062
	1466	1196.98	321.564		1466	857.886	399.335		1466	501.325	177.549
	1467	1169.94	321.922		1467	839.219	397.576		1467	500.184	177.776
	1468	1155.68	323.128		1468	829.061	394.843		1468	497.68	177.197
	1469	1154.44	323.601		1469	822.473	394.105		1469	494.841	177.22
	1470	1128.17	323.156		1470	814.102	392.053		1470	494.94	178.342
	1471	1087.93	322.729		1471	802.114	391.803		1471	496.115	177.679
	1472	1083.2	321.932		1472	784.553	390.97		1472	496.062	178.101
	1473	1067.53	321.417		1473	767.288	389.46		1473	496.564	176.998
	1474	1033.69	323.054		1474	752.843	387.909		1474	494.413	177.455
	1475	1011.52	324.364		1475	746.546	385.929		1475	491.448	177.36
	1476	994.534	325.04		1476	743.586	385.048		1476	490.325	179.183
	1477	959.795	325.72		1477	736.794	384.182		1477	489.353	177.582
	1478	955.099	369.871		1478	725.331	383.869		1478	490.738	178.397
	1479	933.793	452.746		1479	710.124	382.324		1479	492.532	178.002
	1480	901.066	524.21		1480	696.359	381.464		1480	490.077	178.272
	1481	884.963	593.157		1481	687.192	379.778		1481	488.042	176.204
	1482	878.265	656.602		1482	683.364	377.594		1482	486.073	177.733
	1483	853.026	715.486		1483	680.96	378.063		1483	483.867	177.095
	1484	818.094	766.405		1484	674.383	376.884		1484	484.112	176.778
	1485	813.732	814.467		1485	664.309	375.957		1485	487.054	177.463
	1486	798.429	857.928		1486	652.531	374.874		1486	486.622	178.42
	1487	785.627	899.626		1487	641.24	374.645		1487	485.708	177.358
	1488	772.841	944.879		1488	635.652	372.241		1488	483.487	177.42
	1489	747.08	983.534		1489	634.793	371.325		1489	482.894	177.44
	1490	724.863	1017.77		1490	633.15	370.034		1490	481.068	177.7
	1491	722.503	1049.84		1491	627.464	370.473		1491	482.817	177.453
	1492	710.069	1078.14		1492	617.494	370.412		1492	483.501	178.636
	1493	699.189	1107.61		1493	607.158	368.857		1493	484.679	178.089
	1494	688.507	1140.15		1494	599.094	367.237		1494	482.347	177.975
	1495	657.38	1171.86		1495	596.062	367.239		1495	478.972	177.479
	1496	665.045	1203.87		1496	595.824	365.649		1496	479.062	177.541
	1497	651.245	1227.61		1497	594.591	364.982		1497	478.963	177.268
	1498	639.648	1250.3		1498	590.159	365.212		1498	480.856	177.656
	1499	630.845	1273.4		1499	580.289	363.921		1499	481.737	177.049
	1500	622.567	1297.85		1500	571.18	364.073		1500	481.868	176.982
